# Supplementary material for: Tungsten single atoms incorporated in cobalt spinel oxide for highly efficient electrocatalytic oxygen evolution in acid
Source: Royal Society of Chemistry journal article supplement (doi:10.1039/d4ee01783h), 2024-01-01
Supplement: d4ee01783h1.pdf [file d4ee01783h1.pdf]

## Supporting Information

### **Tungsten Single Atoms Incorporated in Cobalt Spinel Oxide for Highly Efficient Electrocatalytic Oxygen Evolution in Acid**

Jing Cao<sup>1,2</sup>, Dezheng Zhang<sup>1,2</sup>, Bianqing Ren<sup>1,2</sup>, Ping Song<sup>1\*</sup>, Weilin Xu<sup>1,2\*</sup>

1 State Key Laboratory of Electroanalytical Chemistry, Changchun Institute of Applied Chemistry, Chinese Academy of Sciences, Changchun 130022, PR China

2 University of Science and Technology of China, Hefei 230026, PR China

Corresponding author: Ping Song (songping@ciac.ac.cn), Weilin Xu (weilinxu@ciac.ac.cn)

## Methods

### Materials

Tungstic acid ( $\text{H}_2\text{WO}_4$ , solid, 99%), Cobaltous nitrate hexahydrate ( $(\text{Co}(\text{NO}_3)_2 \cdot 6\text{H}_2\text{O})$ , solid, 99%) were purchased from Aladdin. hydrogen peroxide ( $\text{H}_2\text{O}_2$ , liquid, 30%) and sulfuric acid ( $\text{H}_2\text{SO}_4$ , liquid,  $\geq 96\%$ ) were purchased from Xilong scientific. Carbon paper (HGP-H-90, EC-TP1-060T) was purchased from Toray.

### Catalysts synthesis

The preparation of  $\text{W-Co}_3\text{O}_4$  was based on a thermal decomposition method, as described previously<sup>1</sup>. In a typical synthesis, 0.15 g  $\text{H}_2\text{WO}_4$  was first dissolved in 6 mL  $\text{H}_2\text{O}_2$  and heated at 80 °C to obtain a homogeneous solution (0.1 mol /L  $\text{H}_2\text{WO}_4$ ). Add 100  $\mu\text{L}$  0.1 mol /L  $\text{H}_2\text{WO}_4$  to 450  $\mu\text{L}$  of 0.3 mol/L  $\text{Co}(\text{NO}_3)_2$  solution and mix well. Then, a 1cm\*2 cm hydrophilic carbon paper (HGP-H-90) was placed in the center of a 1.5cm \*2.5 cm hydrophobic carbon paper (EC-TP1-060T), the W-Co mixed solution was dropped onto the exposed hydrophilic carbon paper and calcined on at 450 °C in the air (or 350 °C or 500 °C as specifically discussed) for 2 h in a muffle furnace to transform into oxides. The resultant electrode was sonicated for 10 s to remove any loosely connected particles and rinsed with Milli-Q ultra-pure water. Finally, the electrodes were dried for 12 hours at 40 °C in an oven.  $\text{Co}_3\text{O}_4$ ,  $\text{WO}_3$ , and  $\text{W-Co}_3\text{O}_4$  with different amounts of W dopant were prepared also following the same procedure by thermal decomposition of  $\text{Co}(\text{NO}_3)_2$  (0.3 mol/L, 450  $\mu\text{L}$ ),  $\text{H}_2\text{WO}_4$  (0.1 mol/L, 450  $\mu\text{L}$ ), two W-Co mixed solution (120  $\mu\text{L}$   $\text{H}_2\text{WO}_4$  + 450  $\mu\text{L}$   $\text{Co}(\text{NO}_3)_2$ , 80  $\mu\text{L}$   $\text{H}_2\text{WO}_4$  + 450  $\mu\text{L}$   $\text{Co}(\text{NO}_3)_2$ ).

The synthesis process of  $\text{Mo-Co}_3\text{O}_4$ ,  $\text{Nb-Co}_3\text{O}_4$ ,  $\text{Ni-Co}_3\text{O}_4$ , and  $\text{Mn-Co}_3\text{O}_4$  were the same as that of  $\text{W-Co}_3\text{O}_4$ , the precursor salts used were  $\text{NbCl}_5$ ,  $(\text{NH}_4)_2\text{MoO}_4$ ,  $\text{Ni}(\text{NO}_3)_2$ , and  $\text{Mn}(\text{NO}_3)_2$ , respectively.

The synthesis process of  $\text{W-MnO}_2$ ,  $\text{MnO}_2$  were the same as that of  $\text{W-Co}_3\text{O}_4$ , and only need to replace  $\text{Co}(\text{NO}_3)_2$  to  $\text{Mn}(\text{NO}_3)_2$ .

The preparation of  $\text{WO}_3/\text{Co}_3\text{O}_4$ : 0.015g of  $\text{H}_2\text{WO}_4$  was first dissolved in 6 mL of  $\text{H}_2\text{O}$

and heated at 50 °C to achieve complete dissolution. The  $\text{WO}_3/\text{Co}_3\text{O}_4$  catalyst was synthesised by adding 150  $\mu\text{L}$  of 0.9 mol/L  $\text{Co}(\text{NO}_3)_2$  into 1000  $\mu\text{L}$  of  $\text{H}_2\text{WO}_4$  solution, and then following the procedure for the preparation of  $\text{W-Co}_3\text{O}_4$ .

## Characterizations

Power X-ray diffractometer (PXRD) was performed on a Rigaku Smartlab diffractometer with  $\text{Cu K}\alpha$  radiation. Transmission electron microscopy (TEM), High-Angle Annular Dark Field-Scan transmission electron microscopy (HAADF-STEM), Element mapping analysis and electronic energy loss spectroscopy (EELS) were performed on Cs-TEM FEI Titan G2 at 300 kV. Electron paramagnetic resonance (EPR) spectra were conducted on a Bruker A300. Raman spectra were collected with a LabRAM HR laser Raman analyzer (Horiba/Jobin Yvon, Longjumeau) outfitted with a frequency-doubled Nd: YAG 532.1 nm laser. Inductively coupled plasma optical emission spectroscopy (ICP-OES, Thermo Scientific iCAP 7400) was used to determine the content of W, Co of  $\text{W-Co}_3\text{O}_4$ , and the dissolution of metal of electrolyte after the stability test.

### XAFS measurements

XAFS spectra at the W  $L_3$ -edge energy were collected at the BL14W1 beamlines at the Shanghai Synchrotron Radiation Facility (Si (111)), The XAFS spectra were recorded at room temperature using a 4-channel Silicon Drift Detector (SDD) Bruker 5040. XAFS spectra at the Co  $K$ -edge were collected was carried out using the *Rapid XAFS 2M* (Anhui Absorption Spectroscopy Analysis Instrument Co., Ltd.) by transmission mode. The energy was calibrated by the absorption edge of W foil and Co foil, respectively. The XAFS spectra of these standard samples were recorded in transmission mode. The XAFS raw data were extracted the data and fitted the profiles by using Athena and Artemis. The theoretical scattering amplitudes, phase shifts, and photoelectron mean free path for all paths were calculated in the IFEFFIT package using a Hanning window. The data were fitted in R-space using theoretical models built based on the

XRD-derived crystal structure.

Differential electrochemical mass spectrometric measurements.

In situ DEMS experiments was performed on an in situ differential electrochemical mass spectrometer provided by Linglu Instruments (Shanghai) Co. Ltd. A typical test was carried out in a three-electrode cell with N<sub>2</sub> saturated 0.5 M H<sub>2</sub>SO<sub>4</sub> as electrolyte. Firstly, the W-Co<sub>3</sub>O<sub>4</sub> and Co<sub>3</sub>O<sub>4</sub> samples were labelled with <sup>18</sup>O isotopes in 0.5 M H<sub>2</sub>SO<sub>4</sub> solution at 1.5 V for 10 minutes. The electrodes were repeatedly cleaned with H<sub>2</sub><sup>16</sup>O and dried in an oven to eliminate any remaining H<sub>2</sub><sup>18</sup>O. To eliminate the electrode of adsorbed <sup>18</sup>O species, cyclic voltammetry was performed between 0.6 and 1.2 V at 50 mV s<sup>-1</sup> before to DEMS measurement. After these operations, the samples were subjected to an in situ DEMS measurement with an applied potential.

Electrochemical measurements

All electrochemical measurements were carried out in a three-electrode cell on CHI 760E. The materials deposited on the carbon paper were directly used as the working electrode, and a carbon rod and a Hg/Hg<sub>2</sub>SO<sub>4</sub> ((saturated K<sub>2</sub>SO<sub>4</sub>) was used as the counter electrode and the reference electrode. O<sub>2</sub> saturated 0.5 M H<sub>2</sub>SO<sub>4</sub> was used as an electrolyte. In this work, all potentials measured are converted to the reversible hydrogen electrode (RHE) and following Eq (1):

$$E (\text{RHE}) = E (\text{Hg}/\text{Hg}_2\text{SO}_4) + 0.675 \text{ V} \quad \text{Eq (1)}$$

Here, 0.675 V is the value to use a reversible hydrogen electrode to calibrate the Hg/Hg<sub>2</sub>SO<sub>4</sub> in 0.5 M H<sub>2</sub>SO<sub>4</sub>. Linear sweep voltammetry (LSV) curves and Cyclic voltammetry (CV) were obtained at a scan rate of 5 mV/s in 0.5 M H<sub>2</sub>SO<sub>4</sub>. The geometric area (0.25 cm<sup>2</sup>) of the electrode exposed to the electrolyte solutions was used to calculate the current density. Based on the resistance values acquired using electrochemical impedance spectroscopy (EIS), the ohmic resistance was adjusted following the electrochemical tests. EIS was collected in the frequency range from 100 kHz to 100 mHz. The stability of catalysts was evaluated by chronopotentiometry at 10 mA/cm<sup>2</sup>.

Calculation of the electrochemically active surface area (ECSA)

The ECSA of catalysts was obtained from the electrochemical double-layer capacitance ( $C_{dl}$ ) according to Eq (2):

$$ECSA = RfS = \frac{C_{dl}}{C_s} S \quad \text{Eq(2)}$$

$C_{dl}$  was measured from double-layer charging curves using cyclic voltammetry in a non-Faradaic region with a scan rate from 2 to 12  $\text{mV s}^{-1}$ .  $S$  denotes the smooth metal electrode's real surface area, which was generally equal to the geometric area of the glassy carbon electrode ( $S = 0.25 \text{ cm}^2$ ). In this work, according to previous research, the specific capacitance ( $C_s$ ) for a flat surface was used to be  $60 \mu\text{F cm}^{-2}$  to estimate the ECSA.<sup>2</sup>

PEMWE tests

For electrolyzer tests, a self-made cell was used as the PEMWE device and a cation exchange membrane (Nafion 115) as the membrane electrolyte. The MEAs were prepared by using the Pt/C (40 %, JM) as the cathode catalyst coated membrane. The cathode ink was prepared by ultrasonically blending the catalyst with Nafion solution, DI water, and isopropanol, followed by air-sprayed directly onto the Nafion membrane of  $4 \text{ cm}^2$  areas. The Pt loading at the cathode was fixed at  $0.8 \text{ mg/cm}^2$  (Ionomer-to-catalyst ratio was 0.4). The dried Nafion membrane with cathode catalysts was placed in  $0.5 \text{ M H}_2\text{SO}_4$  solution at  $80 \text{ }^\circ\text{C}$  for 30 min to activate the proton conduction channel, and then heated in deionised water at  $80 \text{ }^\circ\text{C}$  for 30 min, and rinsed with deionised water for several times. The anode was prepared by  $\text{W-Co}_3\text{O}_4$  thermal composition on Pt-coated (2  $\mu\text{m}$ ) Ti felt, and  $\text{W-Co}_3\text{O}_4$  loading at the anode was  $8 \text{ mg/cm}^2$ . The anode and the cathode catalyst coated membrane were hot pressed at 300 pounds for 2 min at  $120 \text{ }^\circ\text{C}$ . To construct the PEM electrolyzers, for cathode, the carbon paper was used as the porous transport layers (PTL). For anode, Pt-coated Ti felt was used as the PTL. The assembly pressure of the fixture is set to 4 N m. The PEM electrolyzers were operated at  $50 \text{ }^\circ\text{C}$ . The reactant of the constructed PEM electrolyzer is MilliQ water, which is supplied through peristaltic

pump circulation, and the flow rate is set as 25 mL min<sup>-1</sup>.

$$\text{Energy efficiency calculation: Energy efficiency} = \frac{1.23 V}{E_{cell}} \quad \text{Eq (3)}$$

where 1.23 V is the theoretical energy of the products,  $E_{cell}$  is the cell voltage (V) required to deliver a current density of 1 A cm<sup>-2</sup>.

Hydrogen production cost= energy consumption × electricity bill

energy consumption is calculated at 1 A cm<sup>-2</sup>, and the electricity bill is obtained from the previous reports (\$ 0.02/Kw h).

$$\text{energy consumption} = \frac{E_{cell} * I_{cell} t}{m_{H2}} \quad \text{Eq(4)}$$

where  $I_{cell}$  is the delivered current (A),  $t$  is the operation time (h),  $m_{H2}$  is the mass of hydrogen produced in a  $t$  duration, which can be calculated by Faraday's laws of electrolysis:  $m_{H2} = \frac{I_{cell} * t}{Z * F} * M_{H2}$   $z=2$  is the number of electrons transferred to produce one hydrogen molecule,  $M_{H2}$  relative molecular mass (2 g mol<sup>-1</sup>).

Calculation of the activation energy

The electrochemical measurements of the catalysts were carried out in 0.5 M H<sub>2</sub>SO<sub>4</sub> solution at various temperatures (25-65 °C) to get the apparent activation energy ( $E_{app}$ ) and the apparent pre-exponential factor ( $A_{app}$ ) for the acidic OER. For heterogeneous electrocatalytic reactions, the current density can be expressed from  $E_{app}$  and  $A_{app}$  in the Arrhenius Eq (5)<sup>3-5</sup>:

$$j = A_{app} \exp\left(\frac{-E_{APP}}{RT}\right) \quad \text{Eq (5)}$$

$R$  is the ideal gas constant (8.314 J K<sup>-1</sup> mol<sup>-1</sup>),  $E_{app}$  can be fitted the slope of the Arrhenius plot using Eq. (6)

$$\left| \frac{\partial(\log_{10} j)}{\partial(1/T)} \right| = -\frac{E_{app}}{2.303R} \quad \text{Eq. (6)}$$

while the intercept of  $\log_{10}j$  vs.  $1/T$  plot is the logarithm of  $A_{app}$ .

Computational details

First-principles DFT within the generalized gradient approximation (GGA) using the

Perdew-Burke-Ernzerhof (PBE) formation were employed the plane-wave code Vienna ab-initio simulation package (VASP).<sup>6-8</sup> The energy cut-off of the plane-wave basis was set at 500 eV for plane-wave expansion. Projector-augmented wave pseudo-potential was used to describe the ionic cores and take valence electrons. The energy difference between iterations was converged until it was smaller than  $10^{-6}$  eV. The optimized (311) plane was adopted as the model for surface reaction pathways.  $\text{Co}_3\text{O}_4$  (311) was constructed by cutting the bulk  $\text{Co}_3\text{O}_4$  along 311 directions. W- $\text{Co}_3\text{O}_4$  structure was constructed by replaced one Co atom on the surface of  $\text{Co}_3\text{O}_4$  according to the XAS fitting data. This slab was separated by a 15 Å vacuum layer in the z direction between the slab and its periodic images. During structural optimizations of the surface models, a  $3 \times 2 \times 1$  gamma-point centered k-point grid for Brillouin zone was used. The d-band center was calculated by the average of the integral of d-band pDOS information. The Gibbs Free energy was calculated based on the conventional four-step electro-proton coupled OER mechanism proposed by Nørskov.<sup>9</sup>

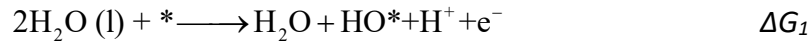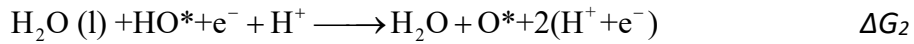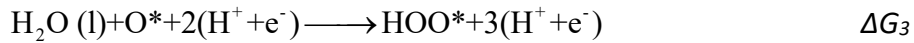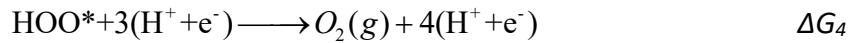

The overpotential ( $\eta$ ) is defined as:

$$\eta = (\max \{\Delta G_1, \Delta G_2, \Delta G_3, \Delta G_4\} - 1.23\text{eV})/e$$

Both free energy profiles were computed on the Ir and Co sites in samples. The overpotentials used were 0 and 1.23 V vs. RHE, respectively. Considering the contributions from zero-point energies and entropies, the Gibbs free energies of adsorption are defined as

$$G_{ads} = E_{ads} + \Delta ZPE - T\Delta S$$

The zero-point energies and entropies of the adsorbates were computed from

vibrational frequency calculations, in which only the adsorbate vibrational modes were computed explicitly, while the catalyst was fixed. The zero-point energies and entropies of gas phase molecules were obtained from NIST database.



## Figures

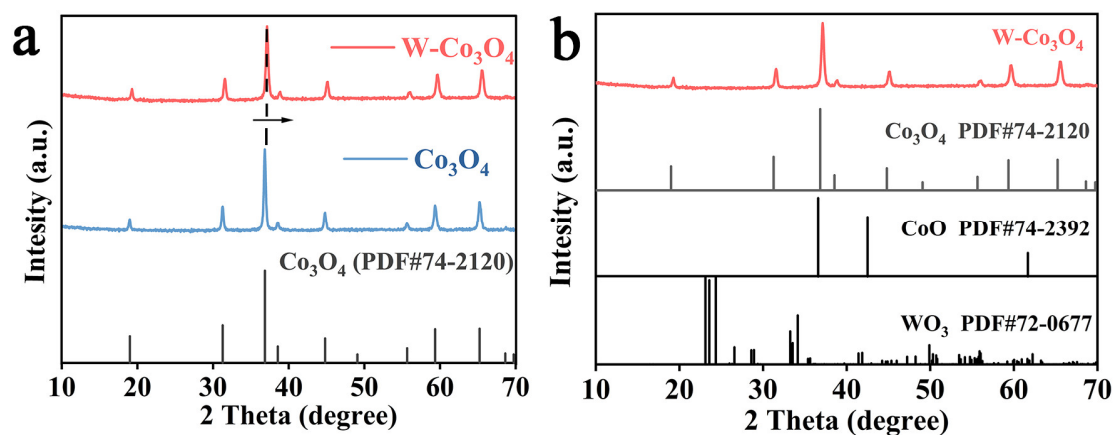

Figure S1. (a-b) Powder XRD patterns of W-Co<sub>3</sub>O<sub>4</sub>, Co<sub>3</sub>O<sub>4</sub> and standard of Co<sub>3</sub>O<sub>4</sub>, CoO, and WO<sub>3</sub>. The result demonstrated that W-Co<sub>3</sub>O<sub>4</sub> did not exist CoO and WO<sub>3</sub> phases.

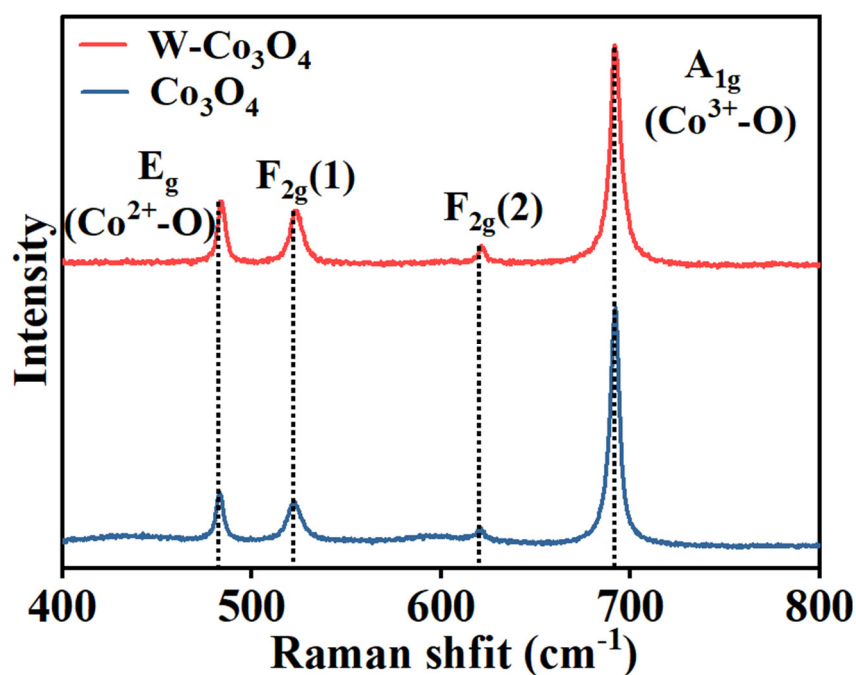

Figure S2. Raman spectra of W-Co<sub>3</sub>O<sub>4</sub>, Co<sub>3</sub>O<sub>4</sub>. In the Raman spectra, the ratio of Co<sup>2+</sup>/Co<sup>3+</sup> in the catalysts can be calculated based the ratio of integrated peak intensity associated with Co<sup>2+</sup>-O vibrations (F<sub>2g</sub> to that of associated with Co<sup>3+</sup>-O vibration (A<sub>1g</sub>). The ratios are higher in W-Co<sub>3</sub>O<sub>4</sub> compared to that Co<sub>3</sub>O<sub>4</sub>, indicating a higher ratio of Co<sup>2+</sup> to Co<sup>3+</sup> than Co<sub>3</sub>O<sub>4</sub>.

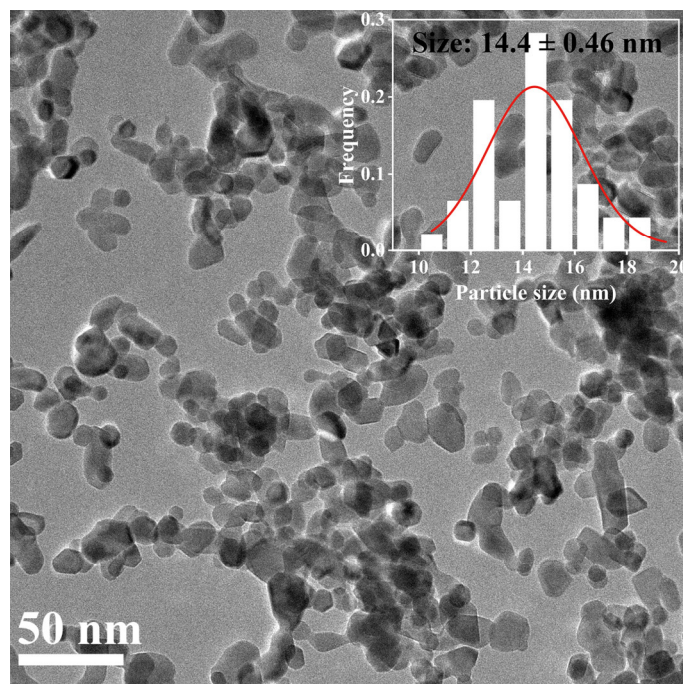

Figure S3. TEM image and particle size distribution of  $\text{Co}_3\text{O}_4$ .

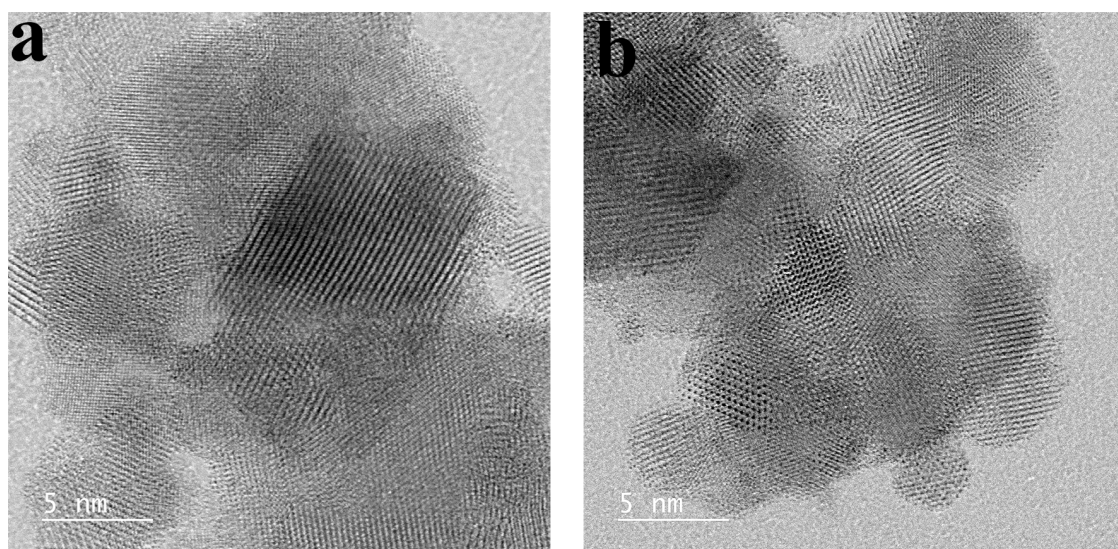

Figure S4. HR-TEM images of  $\text{Co}_3\text{O}_4$  (a) and  $\text{W-Co}_3\text{O}_4$  (b).

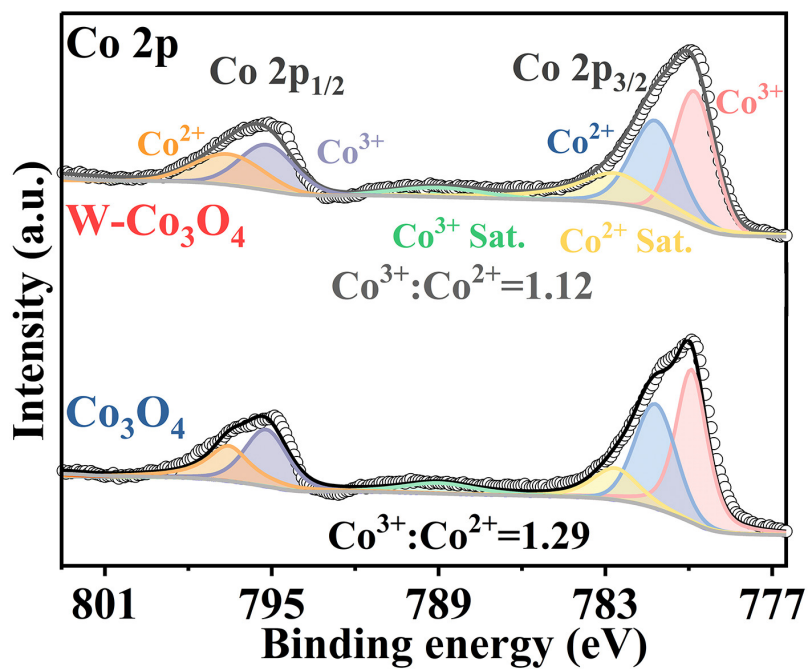

Figure S5. The Co 2p spectra of powder W-Co<sub>3</sub>O<sub>4</sub> and Co<sub>3</sub>O<sub>4</sub>.

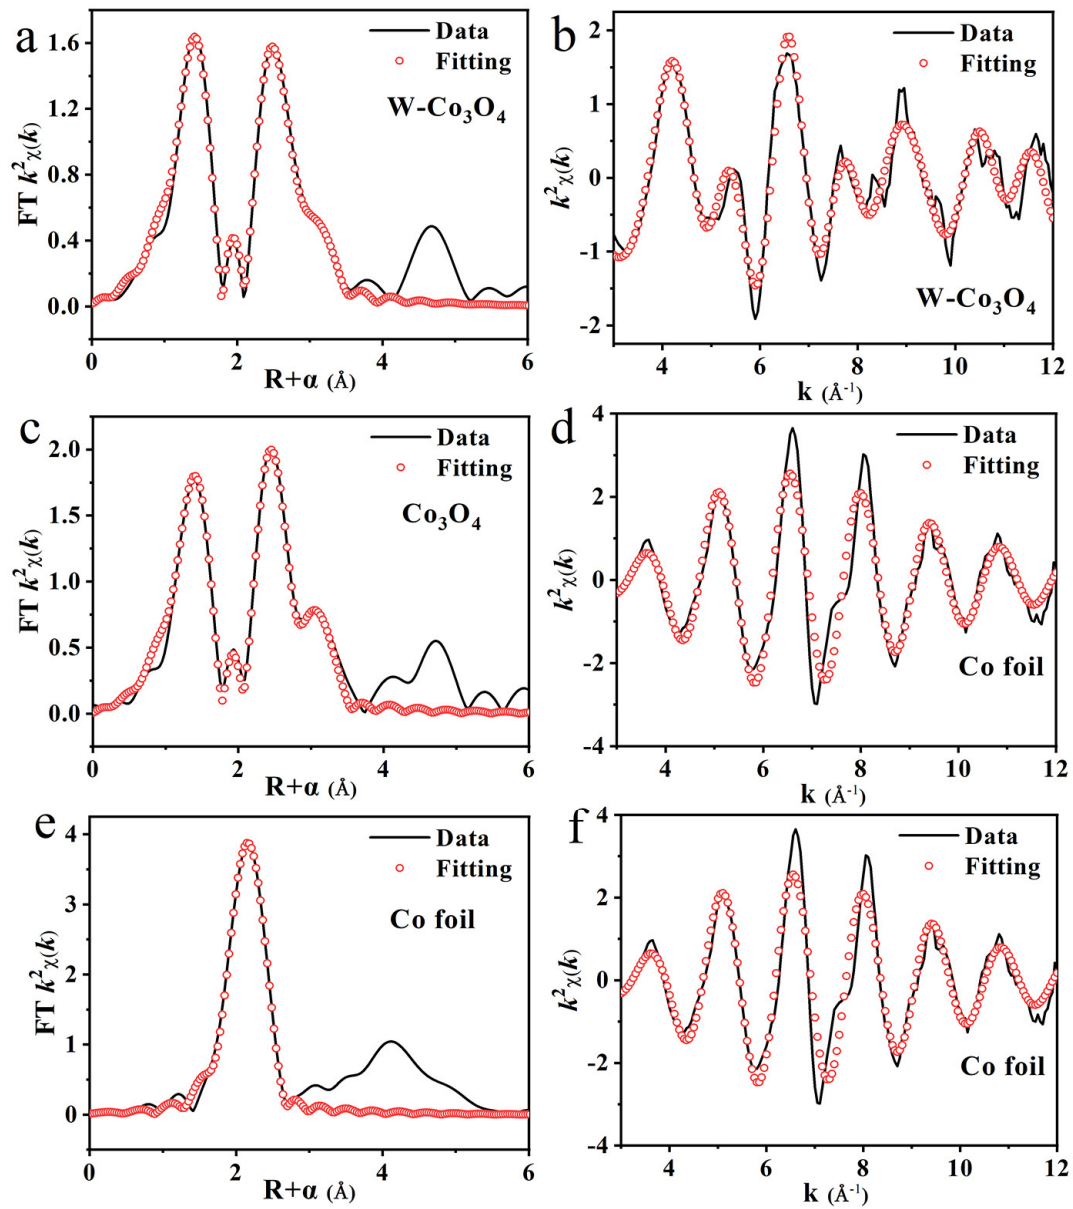

Figure S6. EXAFS fitting. Co K edge EXAFS fitting curves of W-Co<sub>3</sub>O<sub>4</sub>, Co<sub>3</sub>O<sub>4</sub>, and Co foil. at (a, c, e) R space and (b, d, f) k space

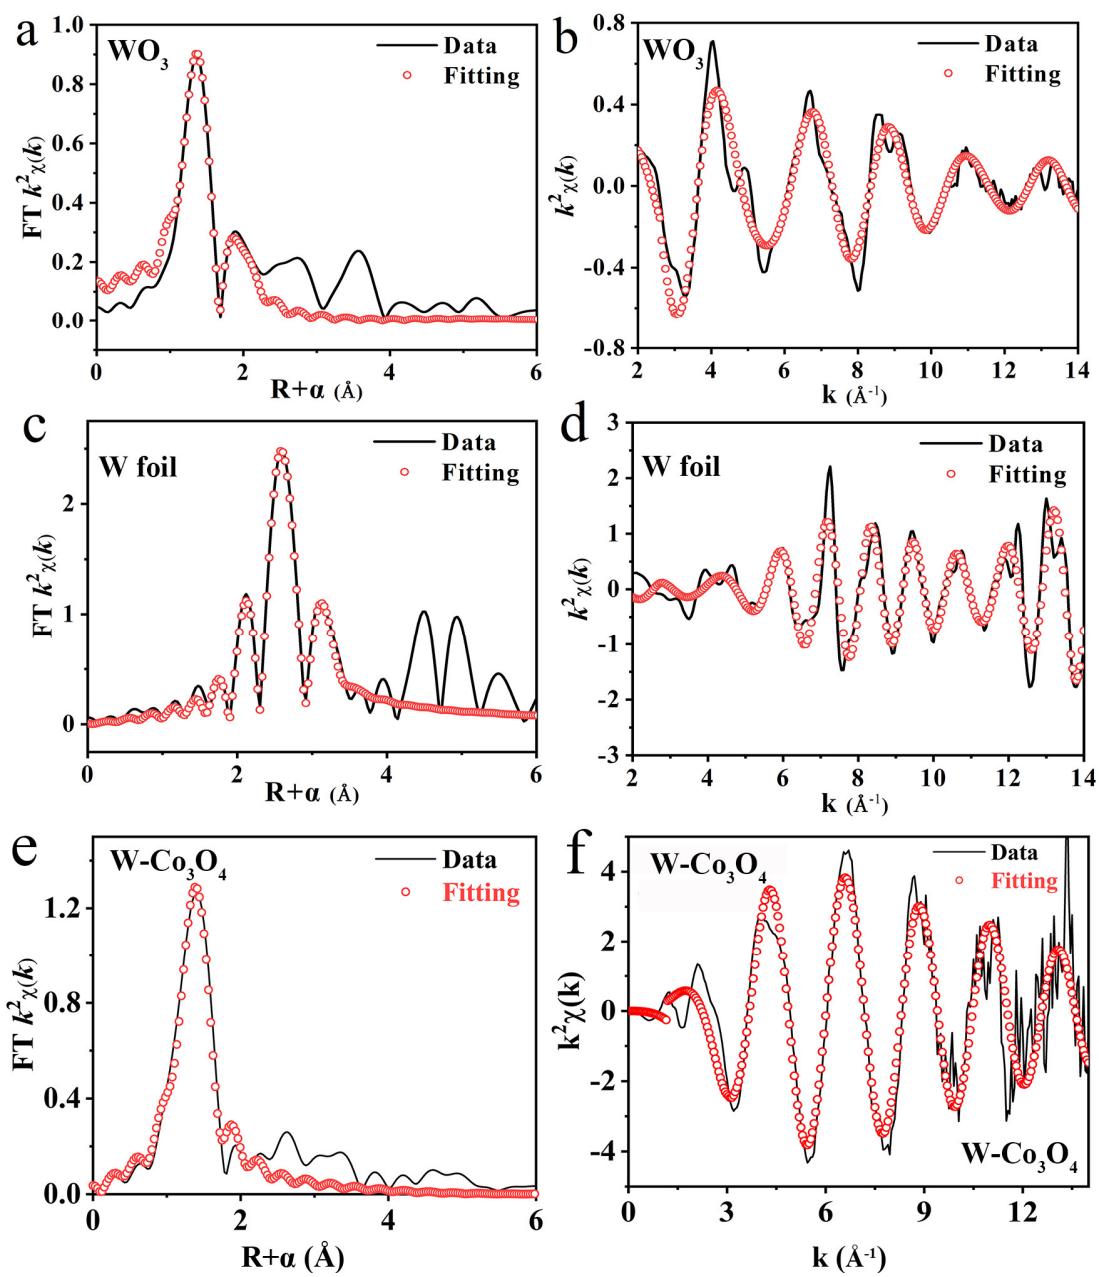

Figure S7. EXAFS fitting. W  $L_3$  edge EXAFS fitting curves of  $\text{WO}_3$ , W foil, and  $\text{W-Co}_3\text{O}_4$  at (a, c, e) R space and (b, d, f) k space

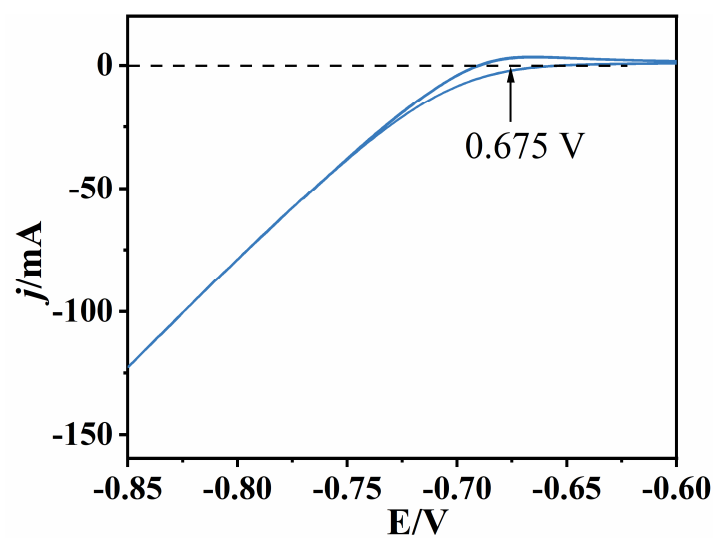

Figure S8. Potential calibration of the Hg/Hg<sub>2</sub>SO<sub>4</sub> electrode at 25 °C in H<sub>2</sub>-saturated 0.5 M H<sub>2</sub>SO<sub>4</sub> solution.

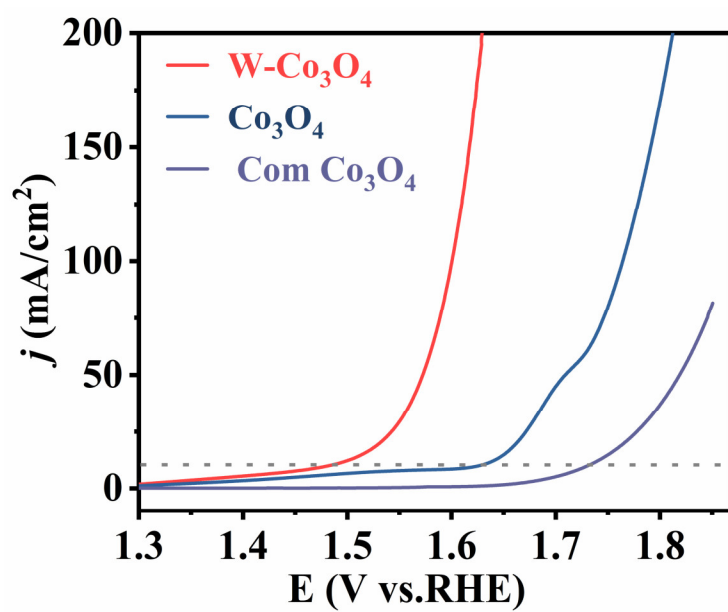

Figure S9. LSV curves of W-Co<sub>3</sub>O<sub>4</sub>, Co<sub>3</sub>O<sub>4</sub>, and Com Co<sub>3</sub>O<sub>4</sub> in 0.5 M H<sub>2</sub>SO<sub>4</sub>.

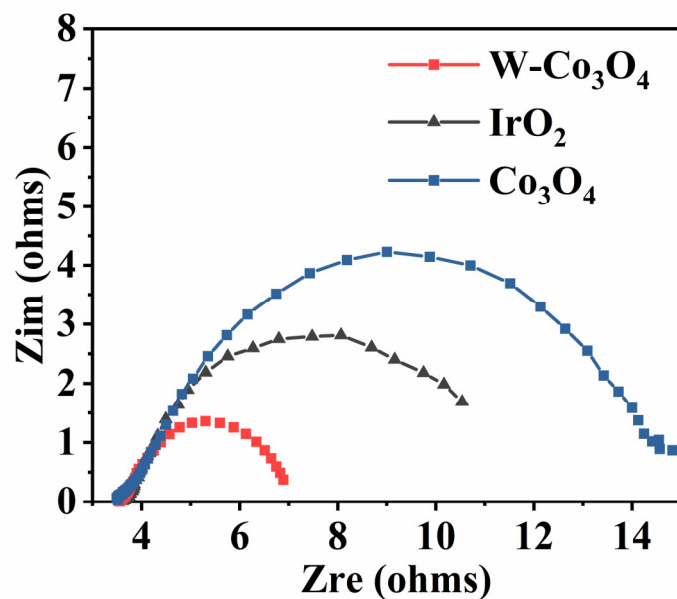

Figure S10. EIS of W-Co<sub>3</sub>O<sub>4</sub>, IrO<sub>2</sub>, and Co<sub>3</sub>O<sub>4</sub>

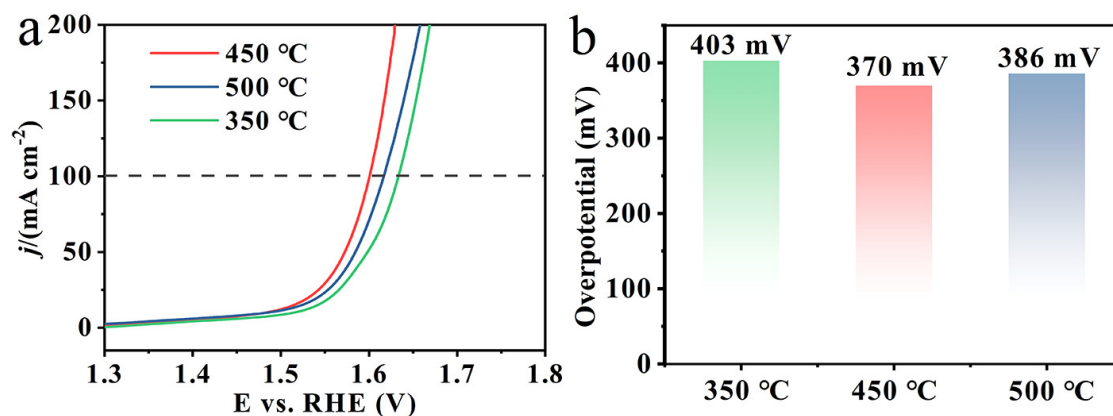

Figure S11. LSV curves (a) and overpotential at 100 mA/cm<sup>2</sup> (b) of the catalysts with different heated temperatures (350, 450, and 500 °C) in the air in 0.5 M H<sub>2</sub>SO<sub>4</sub>. The results indicated that W-Co<sub>3</sub>O<sub>4</sub> with a temperature of 450 °C shows better catalytic activity for OER, compared with catalysts at other temperatures (350, 500 °C), with the overpotential 370 mV at 100 mA/cm<sup>2</sup>. It can be seen intuitively that too low or too high temperature is not favorable to the catalytic reaction.

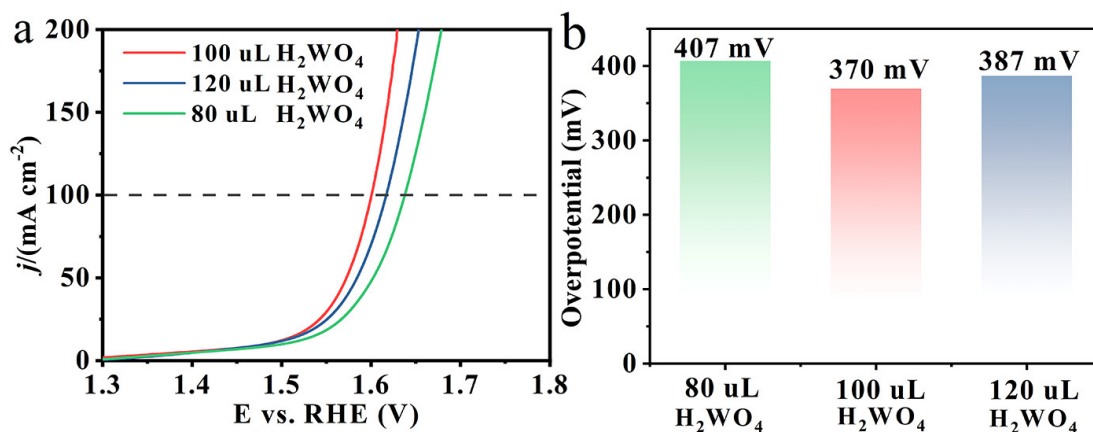

Figure S12. LSV curves (a) and overpotential at 100 mA/cm<sup>2</sup> (b) of the catalysts with different volumes of H<sub>2</sub>WO<sub>4</sub> (80, 100, and 120 uL CH<sub>2</sub>WO<sub>4</sub>: 0.1 mol/L) and 450 uL 0.3 mol/L Co(NO<sub>3</sub>)<sub>2</sub> were dropped onto carbon paper and heated 450 °C in the air. The results indicated that W-Co<sub>3</sub>O<sub>4</sub> with pyrolysis 100 uL H<sub>2</sub>WO<sub>4</sub> shows better catalytic activity for OER, compared with catalysts at other W content, with the overpotential 370 mV at 100 mA/cm<sup>2</sup>. When the W content of W-Co<sub>3</sub>O<sub>4</sub> increased, OER activity decayed. It can be seen intuitively that excessive W loading is not beneficial to the catalytic reaction.

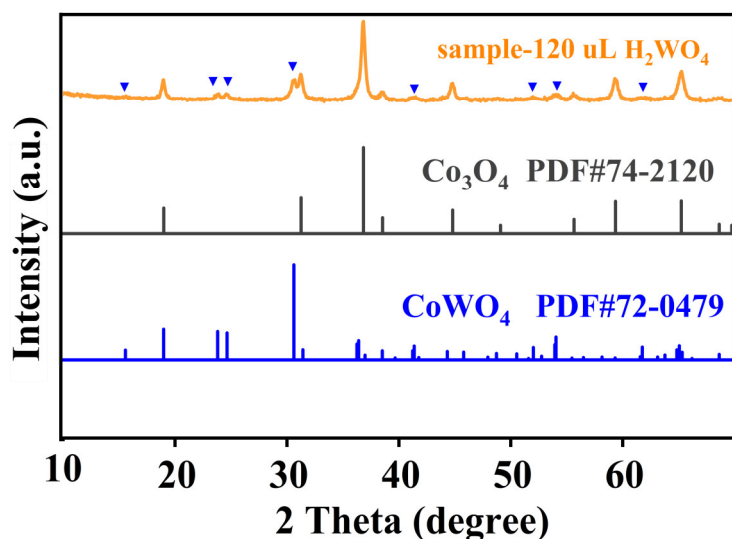

Figure S13. Powder XRD patterns of the sample (120 uL H<sub>2</sub>WO<sub>4</sub>) and standard of Co<sub>3</sub>O<sub>4</sub>, CoWO<sub>4</sub>.

According to the XRD results, the main explanation for the decline in the OER activity of the catalyst with the addition of 120 uL W precursor is the formation of the CoWO<sub>4</sub> phase.



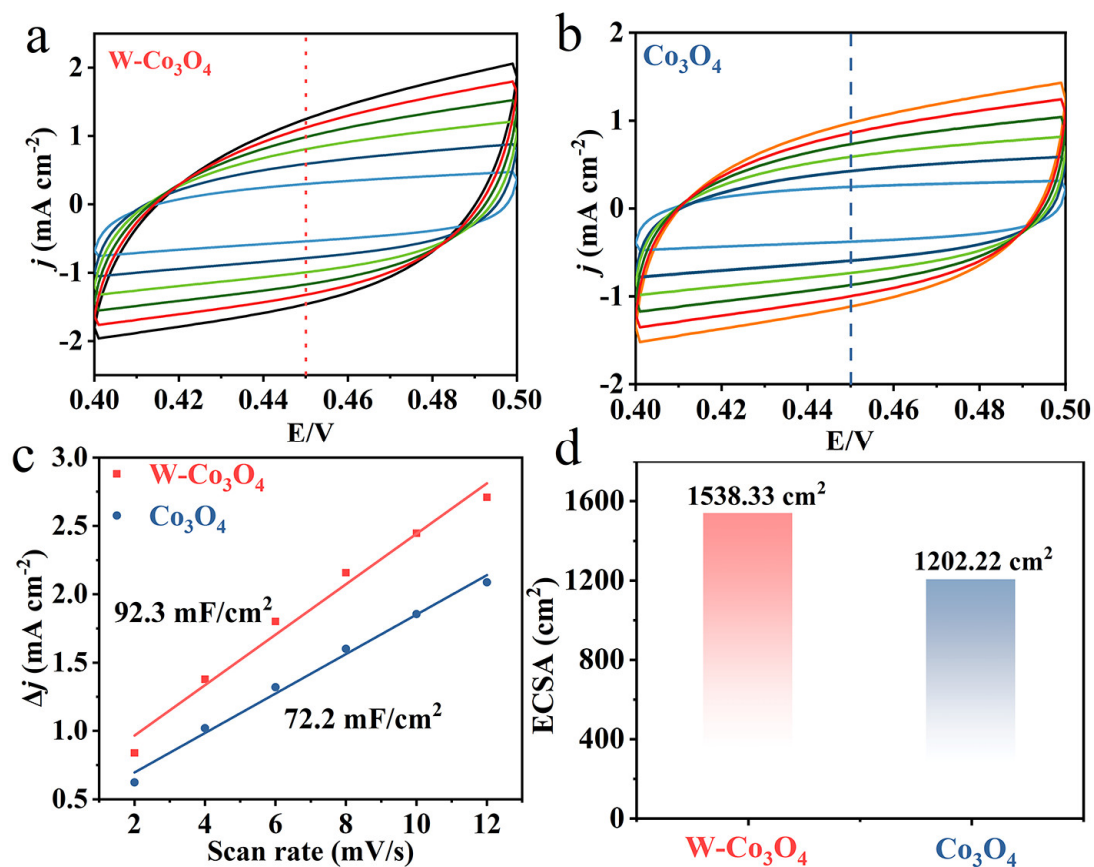

Figure S14. Electrochemical CV scans were recorded for (a) W-Co<sub>3</sub>O<sub>4</sub>, and (b) Co<sub>3</sub>O<sub>4</sub>. Scan rates are 2, 4, 6, 8, 10, and 12 mV/s, respectively. (c) Linear fitting of the capacitive currents versus cyclic voltammetry scans for these catalysts at 0.45 V (E vs Hg/Hg<sub>2</sub>SO<sub>4</sub>). (d) The calculated ECSA values for W-Co<sub>3</sub>O<sub>4</sub> and Co<sub>3</sub>O<sub>4</sub>.

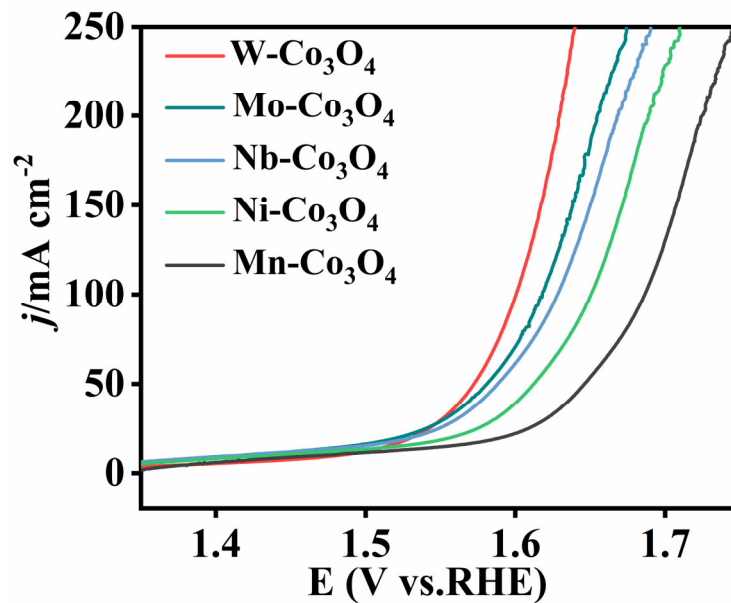

Figure S15. LSV curves of W-Co<sub>3</sub>O<sub>4</sub>, Mo-Co<sub>3</sub>O<sub>4</sub>, Nb-Co<sub>3</sub>O<sub>4</sub>, Ni-Co<sub>3</sub>O<sub>4</sub>, and Mn-Co<sub>3</sub>O<sub>4</sub> in 0.5 M H<sub>2</sub>SO<sub>4</sub>.

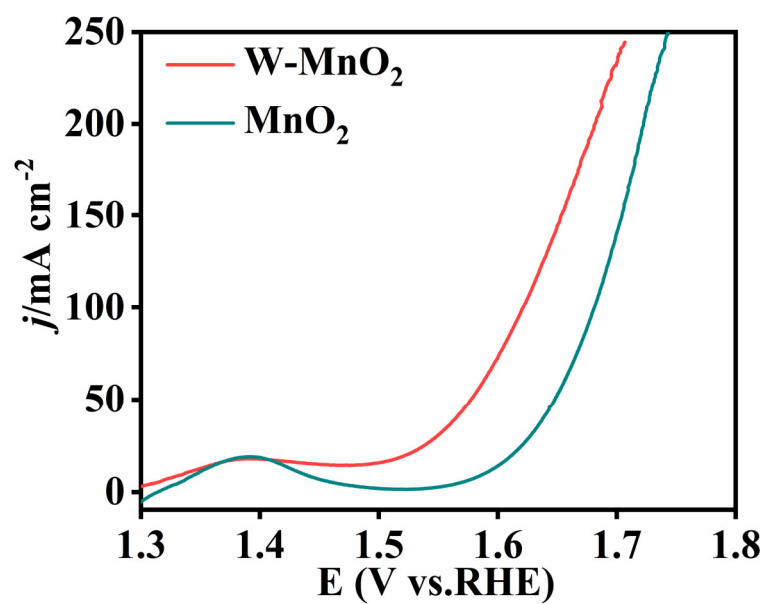

Figure S16. LSV curves of W-MnO<sub>2</sub> and MnO<sub>2</sub> in 0.5 M H<sub>2</sub>SO<sub>4</sub>.

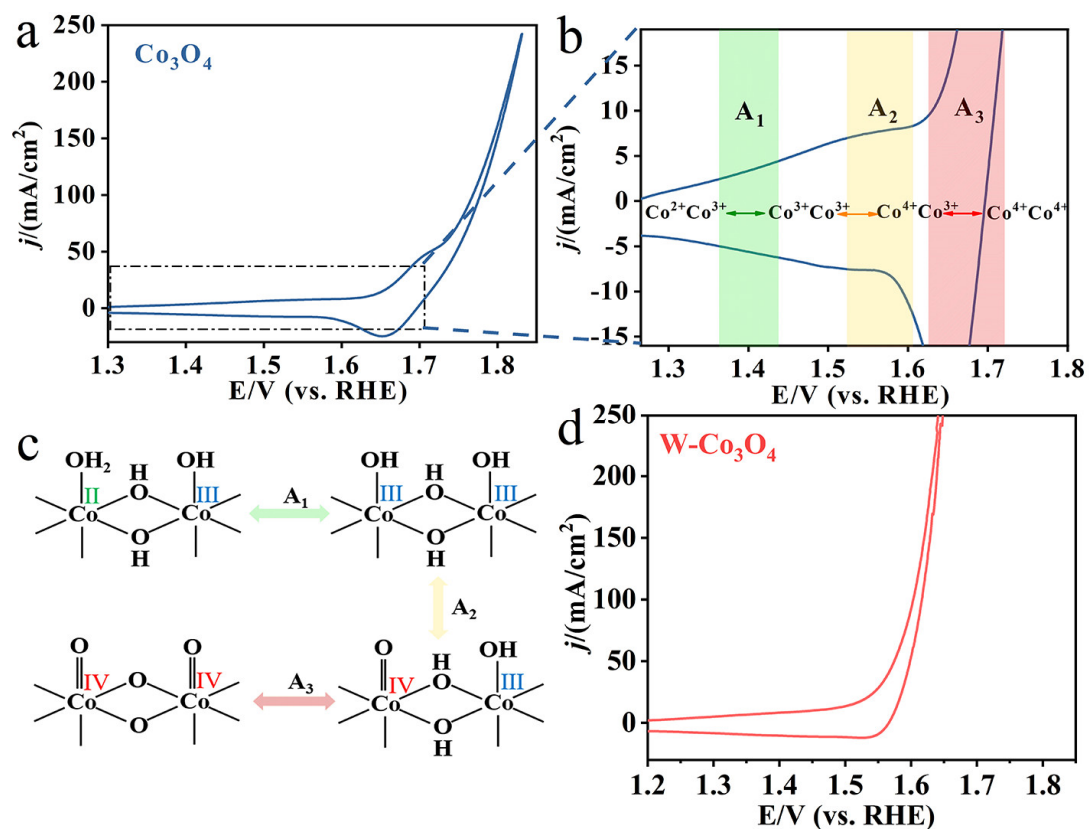

Figure S17. The CV curves of Co<sub>3</sub>O<sub>4</sub> (a) and W-Co<sub>3</sub>O<sub>4</sub> (d) on carbon paper in 0.5 M H<sub>2</sub>SO<sub>4</sub>. (b) Magnified CV curve of the Co<sub>3</sub>O<sub>4</sub> (a) catalyst that highlights the three pre-OER redox features and the corresponding A<sub>1</sub>, A<sub>2</sub>, and A<sub>3</sub> cathodic peaks. (c) Structural associated with the three sets of pre-OER redox features (A<sub>1</sub>, A<sub>2</sub>, and A<sub>3</sub>) present in the Co<sub>3</sub>O<sub>4</sub> catalyst in acidic media that involve dimeric Co redox centers.

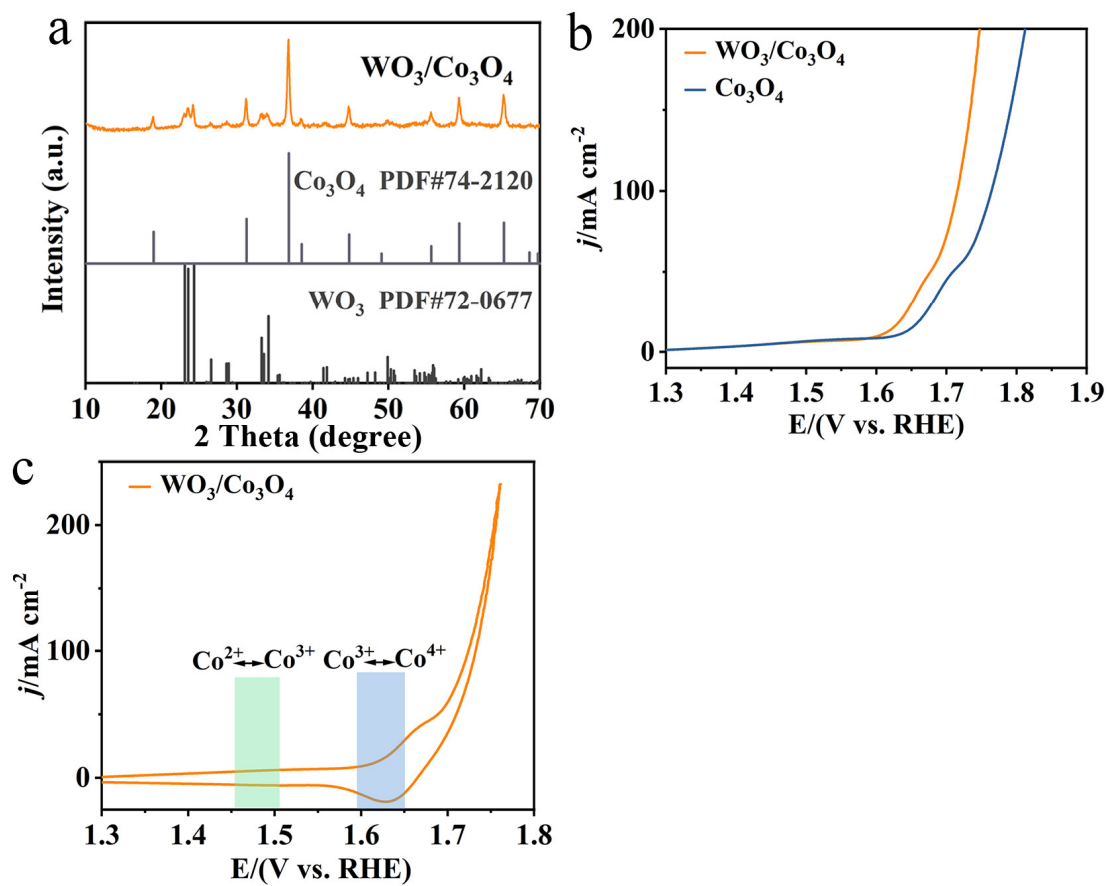

Figure S18. (a) Powder XRD patterns of  $\text{WO}_3/\text{Co}_3\text{O}_4$ . (b) LSV curves of  $\text{WO}_3/\text{Co}_3\text{O}_4$  and  $\text{Co}_3\text{O}_4$ . (c) CV curve of  $\text{WO}_3/\text{Co}_3\text{O}_4$ .

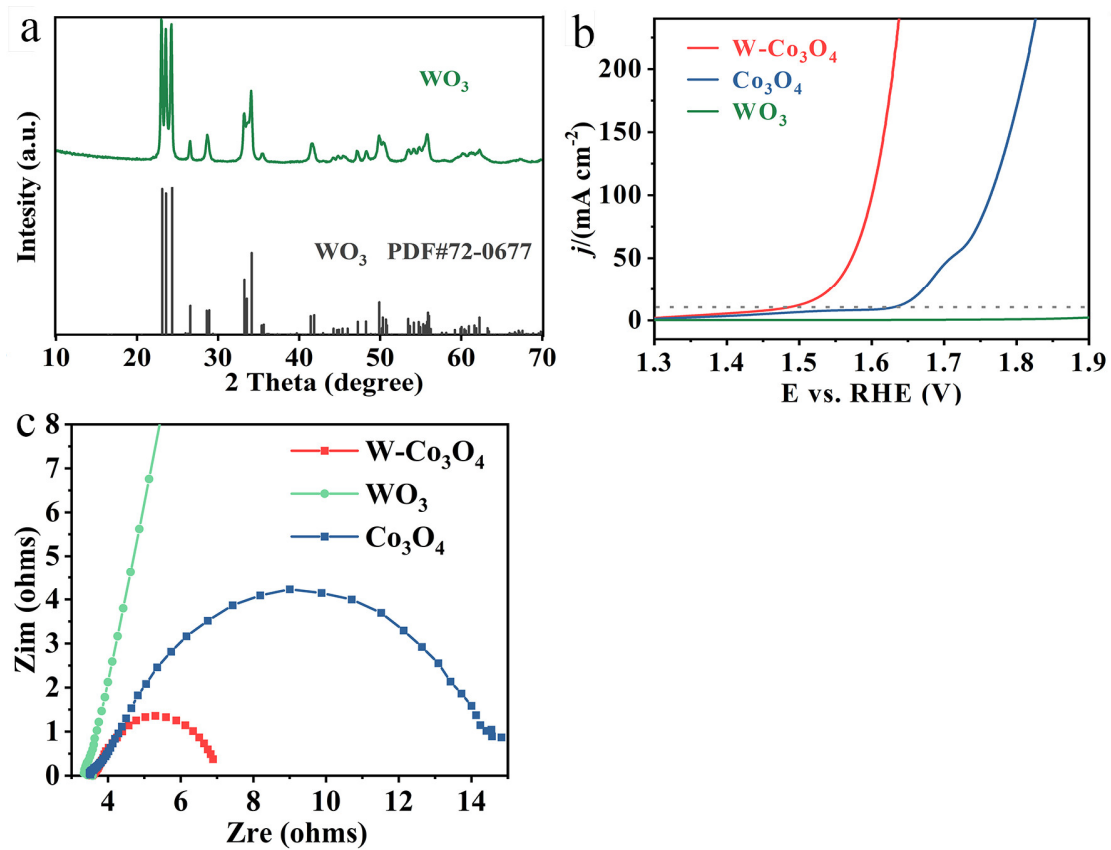

Figure S19. (a) XRD patterns of  $\text{WO}_3$  with the standard of  $\text{WO}_3$ . (b) LSV curves and EIS (c) of  $\text{W-Co}_3\text{O}_4$ ,  $\text{Co}_3\text{O}_4$ , and  $\text{WO}_3$ . The result indicated that  $\text{WO}_3$  did not exhibit OER activity in acid conditions.

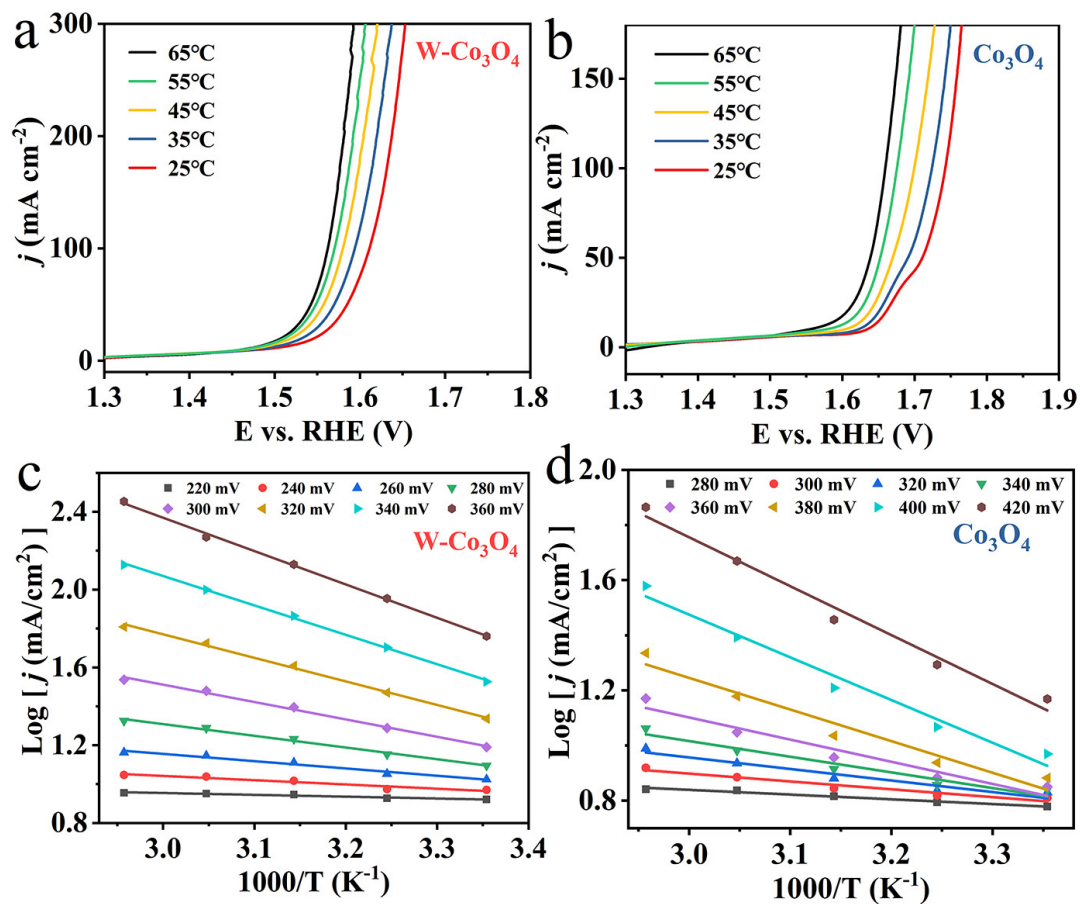

Figure S20. LSV curves of W-Co<sub>3</sub>O<sub>4</sub> (a) and Co<sub>3</sub>O<sub>4</sub> (b) on carbon paper recorded in 0.5 M H<sub>2</sub>SO<sub>4</sub> at different temperatures (25, 35, 45, 55, and 65°C). The apparent activation energy ( $E_{\text{app}}$ ) and pre-exponential factor ( $A_{\text{app}}$ ) of the acidic OER on W-Co<sub>3</sub>O<sub>4</sub> (c) and Co<sub>3</sub>O<sub>4</sub> (d) were calculated by plotting the logarithm of the catalytic current density versus 1000 times the reciprocal of the temperature (in Kelvin).

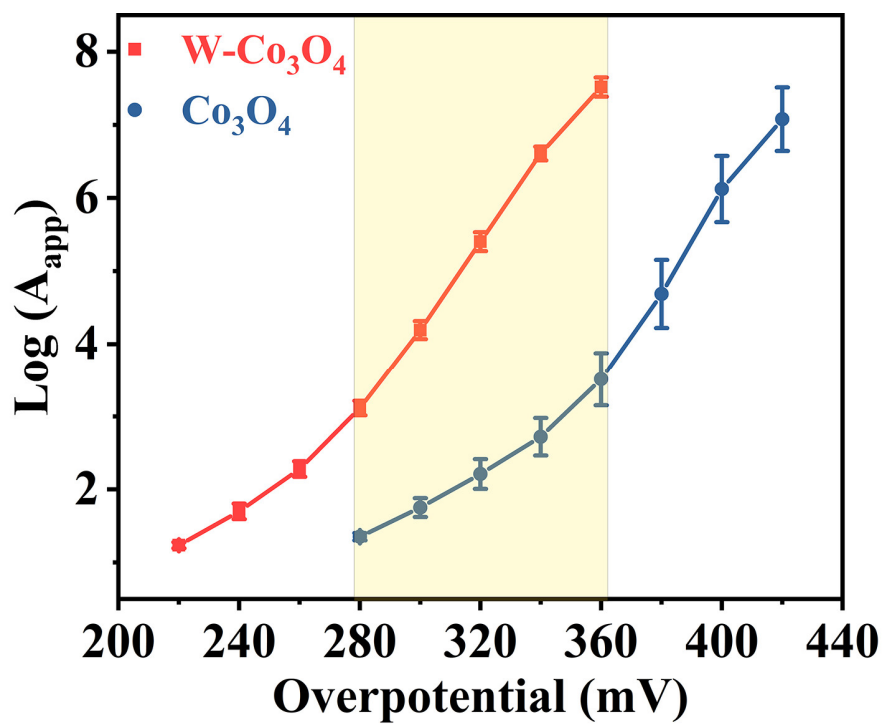

Figure S21. The logarithm of the pre-exponential factor  $A_{app}$  was calculated from the intercept during  $E_{app}$  extraction for W-Co<sub>3</sub>O<sub>4</sub> and Co<sub>3</sub>O<sub>4</sub> catalysts at fixed overpotentials using Arrhenius plots. The error bar represents the standard error from fitting.

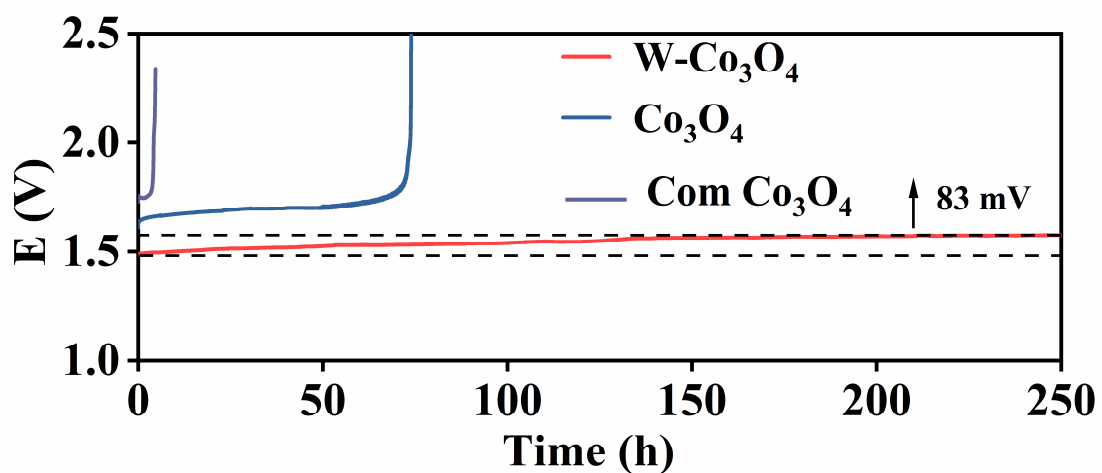

Figure S22. The chronopotentiometry curves of W-Co<sub>3</sub>O<sub>4</sub>, Co<sub>3</sub>O<sub>4</sub>, and Com Co<sub>3</sub>O<sub>4</sub> at 10 mA/cm<sup>2</sup> in 0.5 M H<sub>2</sub>SO<sub>4</sub>.

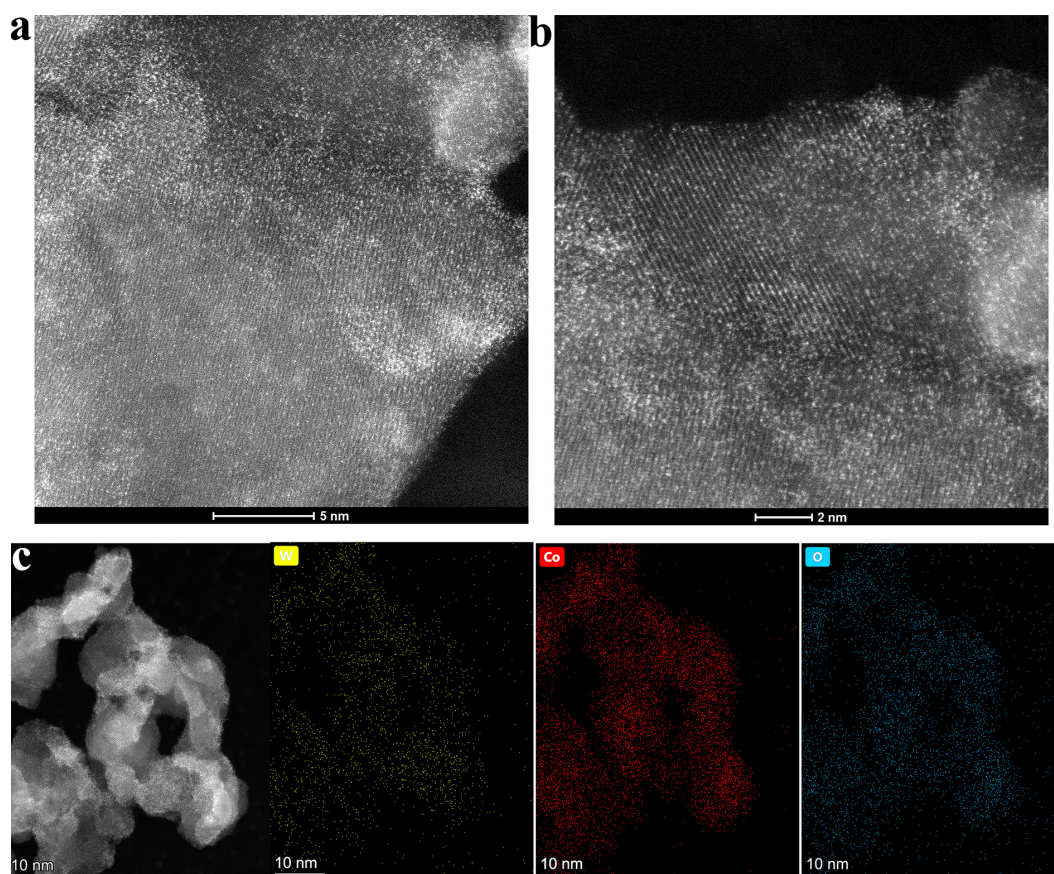

Figure S23. (a-b) The Cs-corrected STEM images of W-Co<sub>3</sub>O<sub>4</sub> after OER. (c) The HAADF-STEM image of W-Co<sub>3</sub>O<sub>4</sub> after OER and corresponding EDS elemental mappings of W, Co, and O.



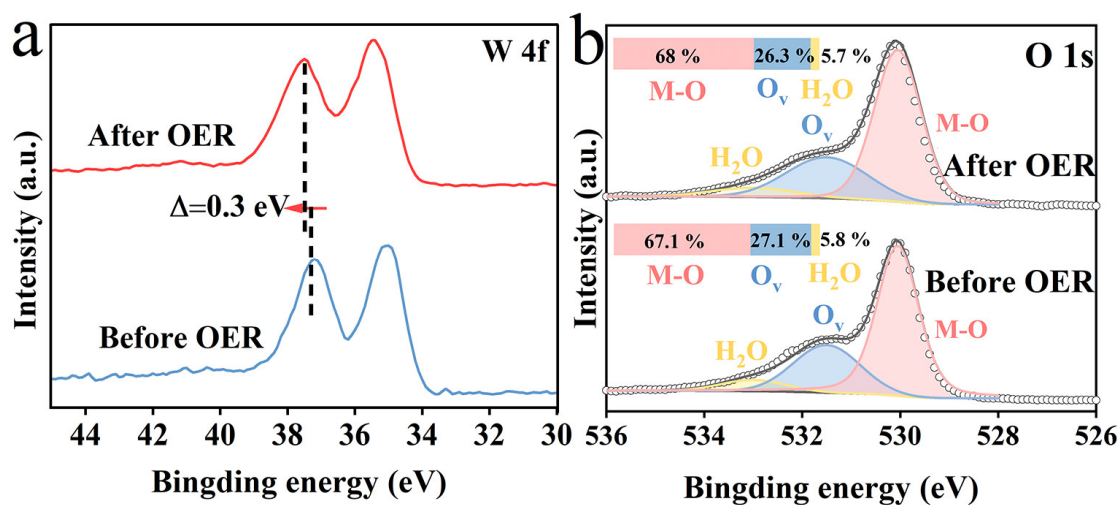

Figure S24. The W 4f and O 1s spectra of W- $Co_3O_4$  on carbon paper after OER and before OER.

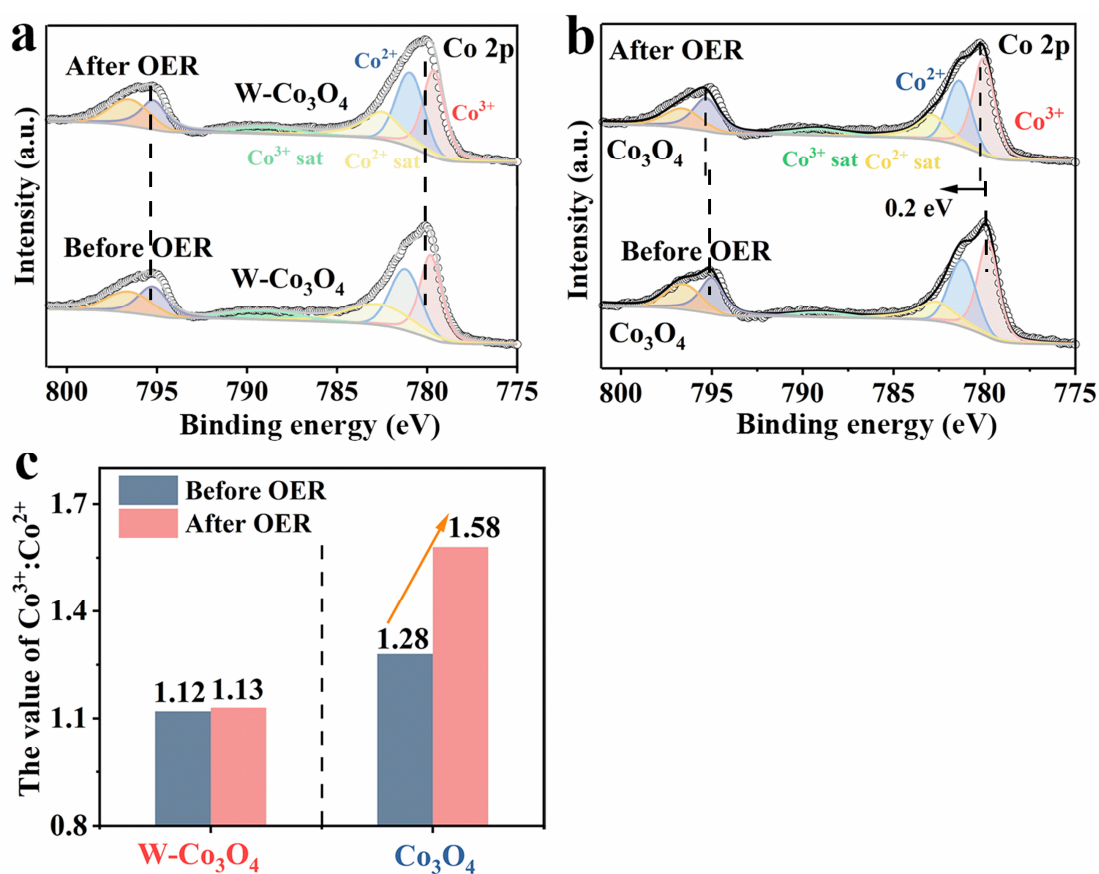

Figure S25. The Co 2p spectra of catalysts on carbon paper after OER and before OER.

(a) W- $Co_3O_4$ , (b)  $Co_3O_4$ . (c) The XPS fitting results of  $Co^{3+} : Co^{2+}$ .

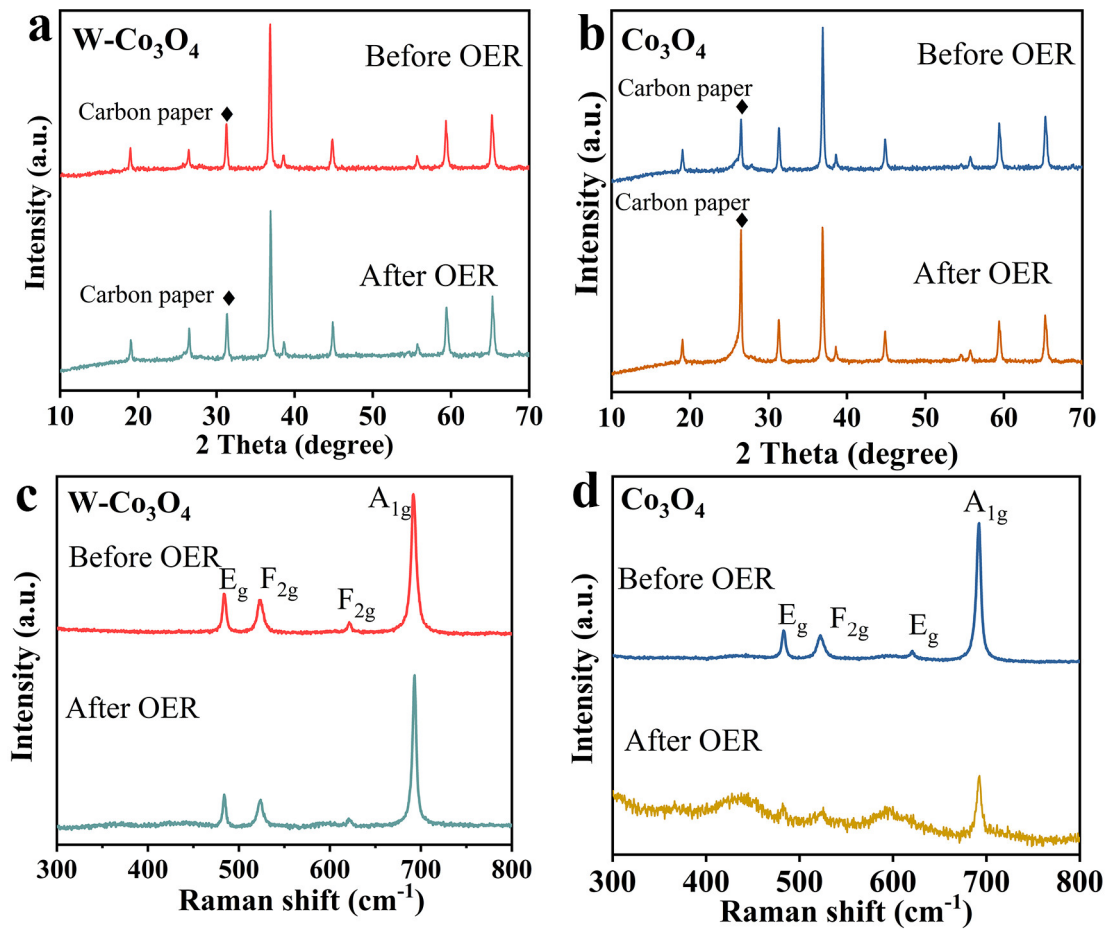

Figure S26. (a-b) XRD patterns of  $W-Co_3O_4$ , and  $Co_3O_4$  on carbon paper after OER and before OER. (c-d) Raman spectra of  $W-Co_3O_4$ ,  $Co_3O_4$  on carbon paper after OER and before OER.

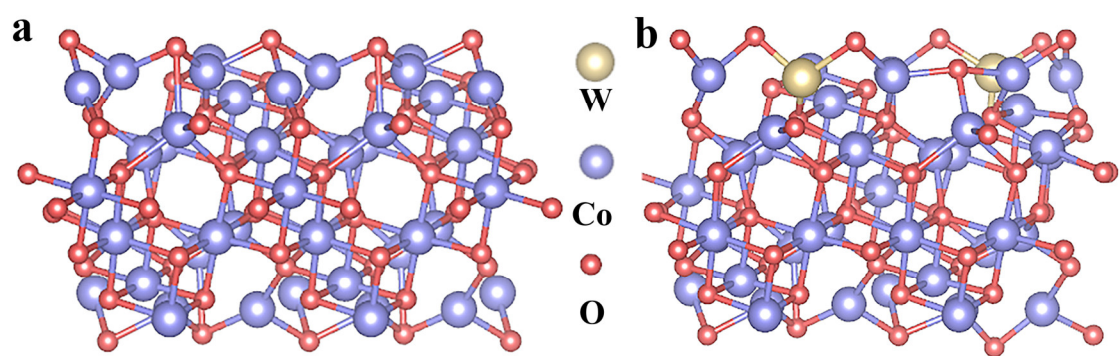

Figure S27. DFT Calculated structures of (a) the  $\text{Co}_3\text{O}_4$  (311) and  $\text{W-Co}_3\text{O}_4$  surface.

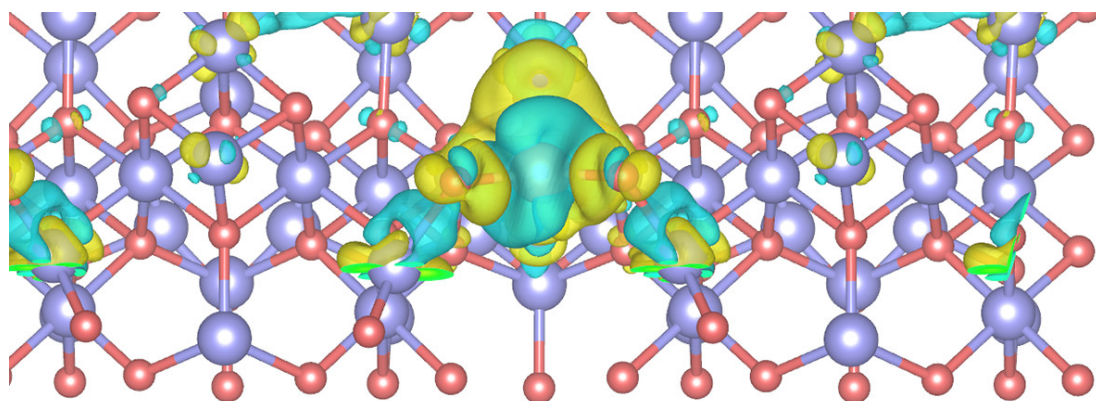

Figure S28. The top panel of charge density difference on  $\text{W-Co}_3\text{O}_4$ .

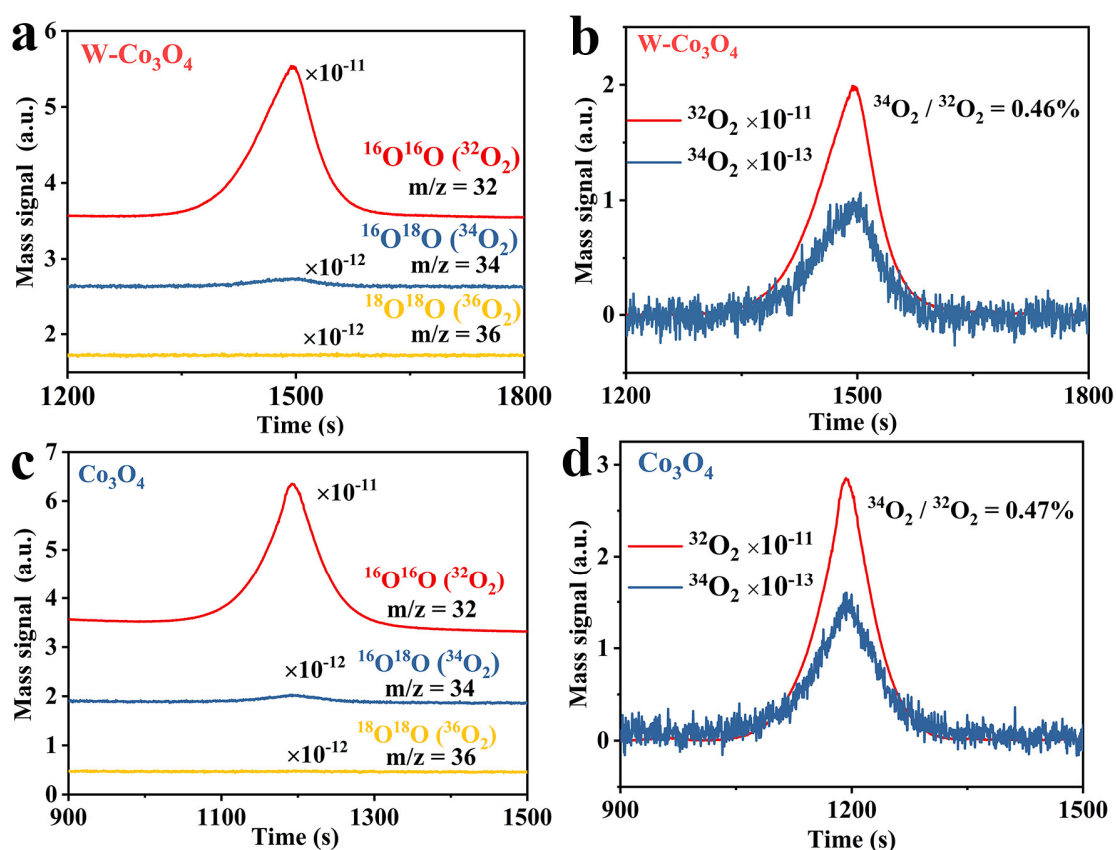

Figure S29. (a) (c) DEMS measurements of  $^{16}\text{O}^{16}\text{O}$ ,  $^{16}\text{O}^{18}\text{O}$ , and  $^{18}\text{O}^{18}\text{O}$  signals from the reaction products for  $^{18}\text{O}$ -labeled W-Co<sub>3</sub>O<sub>4</sub> and Co<sub>3</sub>O<sub>4</sub> catalysts in 0.5M H<sub>2</sub>SO<sub>4</sub> in H<sub>2</sub><sup>16</sup>O. (b) (d) The ratio of  $^{34}\text{O}_2$  to  $^{32}\text{O}_2$  for W-Co<sub>3</sub>O<sub>4</sub> and Co<sub>3</sub>O<sub>4</sub> catalysts.

To validate the occurrence of AEM, we further carried out *in situ* <sup>18</sup>O isotope-labeling Differential Electrochemical Mass Spectrometry (DEMS) measurements. The W-Co<sub>3</sub>O<sub>4</sub> and Co<sub>3</sub>O<sub>4</sub> catalysts were then labeled with <sup>18</sup>O isotopes by potentiostatic reaction in <sup>18</sup>O-labeled 0.5 M H<sub>2</sub>SO<sub>4</sub> electrolyte. As shown in Figure S29a and Figure S29c, the m/z=36 signal was not detected during the OER for W-Co<sub>3</sub>O<sub>4</sub> and Co<sub>3</sub>O<sub>4</sub> catalysts representing the no presence of  $^{36}\text{O}_2(^{18}\text{O}^{18}\text{O})$  in the gas production, and a minimum amount of m/z=34 signal ( $^{16}\text{O}^{18}\text{O}$ ) was detected in OER products on both catalysts. By calculating the ratio of <sup>34</sup>O to O<sub>2</sub> (Figure S29b and Figure S29d), we found that attributable to the natural isotopic abundance (~0.2%) of <sup>18</sup>O in water. **This claim is supported that W-Co<sub>3</sub>O<sub>4</sub> and Co<sub>3</sub>O<sub>4</sub> follow the AEM by DEMS results.**

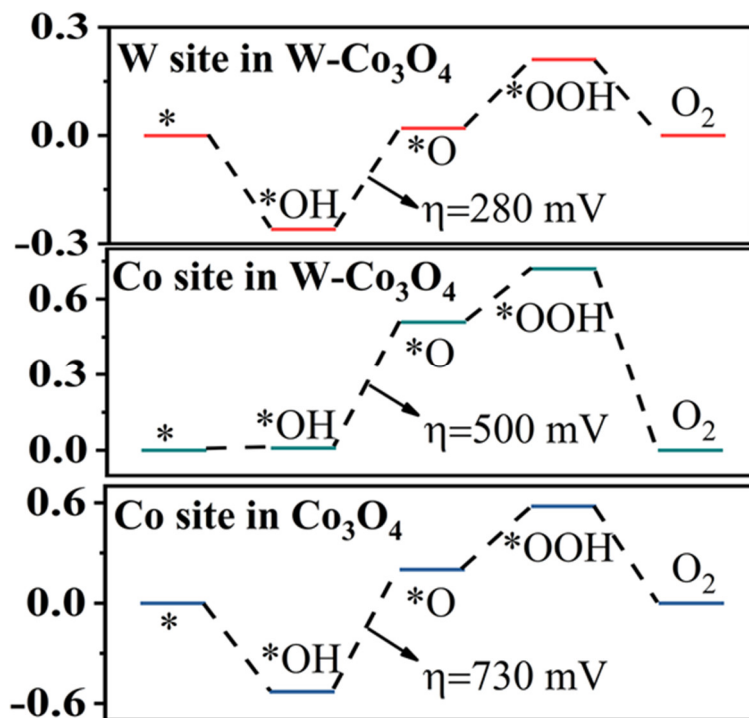

Figure S30. The Gibbs free energy graphs of the four-electron OER process on the W sites and Co sites of these catalysts at 1.23 V vs. RHE applied overpotentials, respectively.

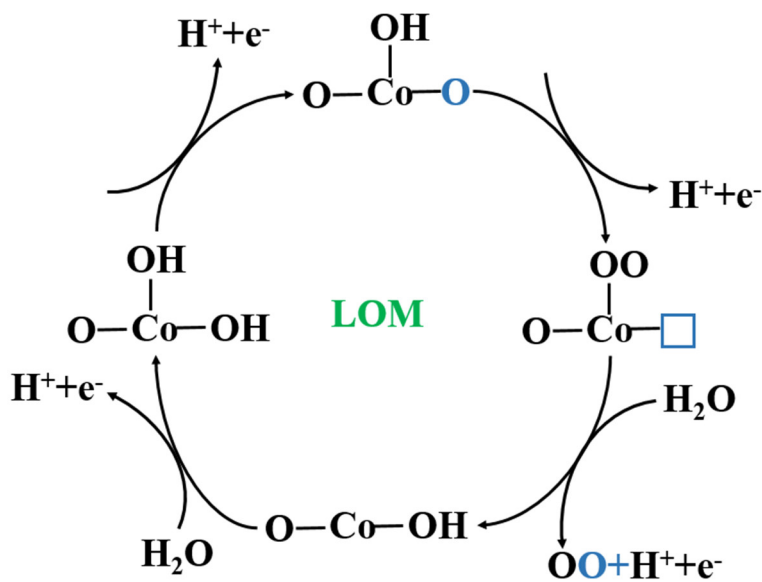

Figure S31. The illustration of LOM mechanism.

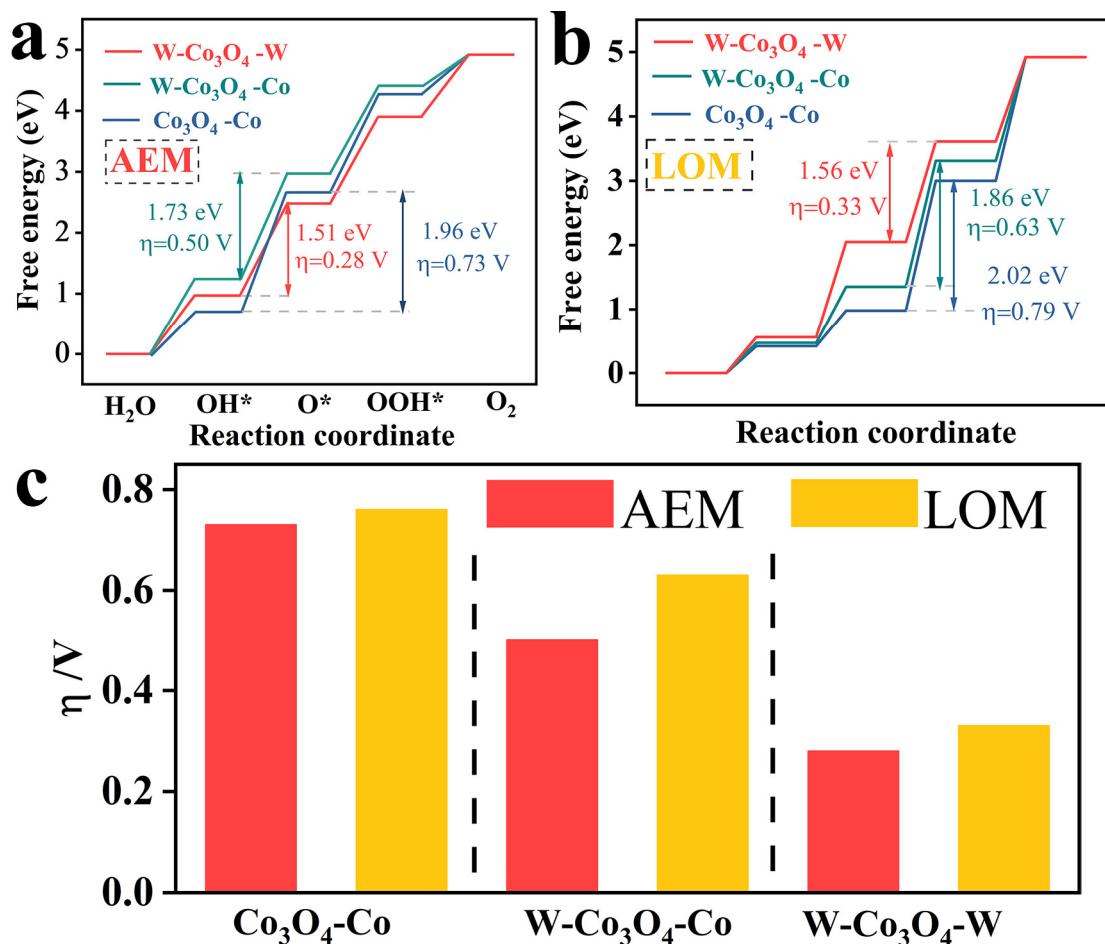

Figure S32. (a) The reaction free energy diagrams for OER at 0 V vs. RHE on Co<sub>3</sub>O<sub>4</sub> (311)-Co, W-Co<sub>3</sub>O<sub>4</sub> (311)-Co, and W-Co<sub>3</sub>O<sub>4</sub> (311)-W by the AEM. (b) The reaction free energy diagrams for OER at 0 V vs. RHE on Co<sub>3</sub>O<sub>4</sub> (311)-Co, W-Co<sub>3</sub>O<sub>4</sub> (311)-Co, and W-Co<sub>3</sub>O<sub>4</sub> (311)-W by the LOM. (c) The theoretical overpotential of Co<sub>3</sub>O<sub>4</sub> (311)-Co, W-Co<sub>3</sub>O<sub>4</sub> (311)-Co, and W-Co<sub>3</sub>O<sub>4</sub> (311)-W by the AEM and LOM.

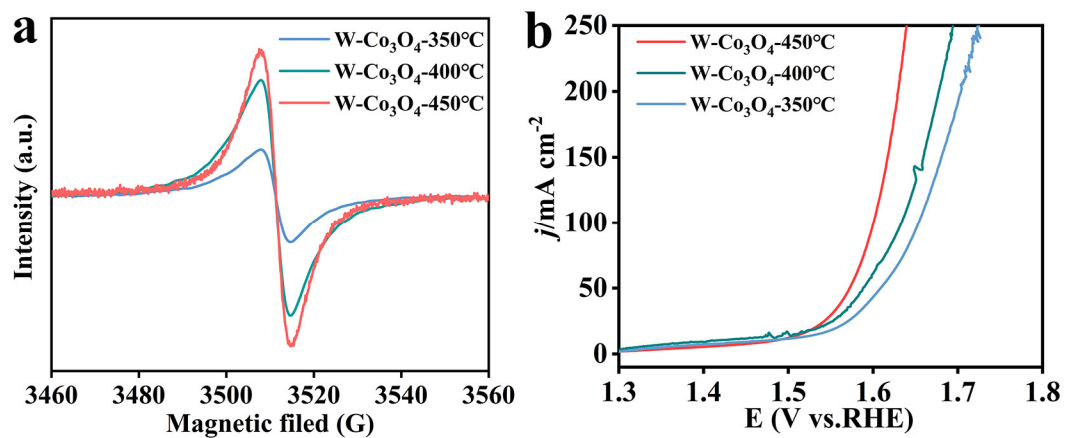

Figure S33. (a) EPR spectra of W-Co<sub>3</sub>O<sub>4</sub> samples with various amounts of oxygen vacancies. (b) LSV curves of W-Co<sub>3</sub>O<sub>4</sub> samples with various amounts of oxygen vacancies in 0.5 M H<sub>2</sub>SO<sub>4</sub>.

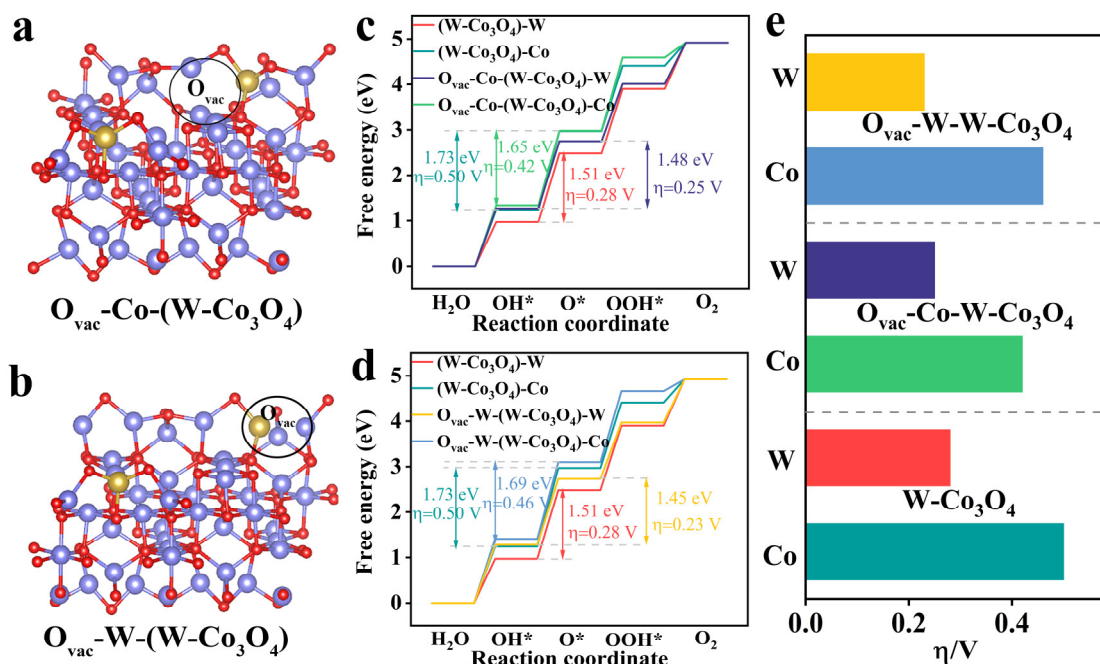

Figure S34. (a-b) DFT Calculated structures of (a)  $O_{vac}\text{-Co-(W-Co}_3\text{O}_4)$  and (b)  $O_{vac}\text{-W-(W-Co}_3\text{O}_4)$ . (c-d) The reaction free energy diagrams of W and Co sites on  $W\text{-Co}_3\text{O}_4$ ,  $O_{vac}\text{-Co-(W-Co}_3\text{O}_4)$ , and  $O_{vac}\text{-W-(W-Co}_3\text{O}_4)$  for OER at 0 V vs. RHE by the AEM. (e) The overpotential determining step of W and Co sites on  $W\text{-Co}_3\text{O}_4$ ,  $O_{vac}\text{-Co-(W-Co}_3\text{O}_4)$ , and  $O_{vac}\text{-W-(W-Co}_3\text{O}_4)$ .

To further confirm the effect of oxygen vacancies on the OER activity of  $W\text{-Co}_3\text{O}_4$  in the above experiments, we then conducted a DFT calculation to explore the OER mechanism. Considering the possible location of oxygen vacancies, we constructed two oxygen vacancy models  $O_{vac}\text{-Co-(W-Co}_3\text{O}_4)$  and  $O_{vac}\text{-W-(W-Co}_3\text{O}_4)$  based on the model of  $W\text{-Co}_3\text{O}_4$  in the neighborhood of Co and W, respectively. According to these two models, we calculated the Gibbs free energy for the OER reaction pathways at the W and Co sites, respectively. As shown in Figure R2-2c and 2d, the rate-limiting step occurs at the  $OH^*$  intermediate to the  $O^*$  intermediate. The results indicated the addition of oxygen vacancies did not change the rate-limiting step of  $W\text{-Co}_3\text{O}_4$  for OER. In addition, as shown in Figures 34e, the overpotential determining step of W and Co sites on  $O_{vac}\text{-Co-(W-Co}_3\text{O}_4)$  and  $O_{vac}\text{-W-(W-Co}_3\text{O}_4)$  are lower than  $W\text{-Co}_3\text{O}_4$ . DFT results indicated that oxygen vacancies can optimize the adsorption energy of W, Co sites on  $W\text{-Co}_3\text{O}_4$ , lower the reaction barrier of the rate-limiting step, and improve the OER catalytic activity.



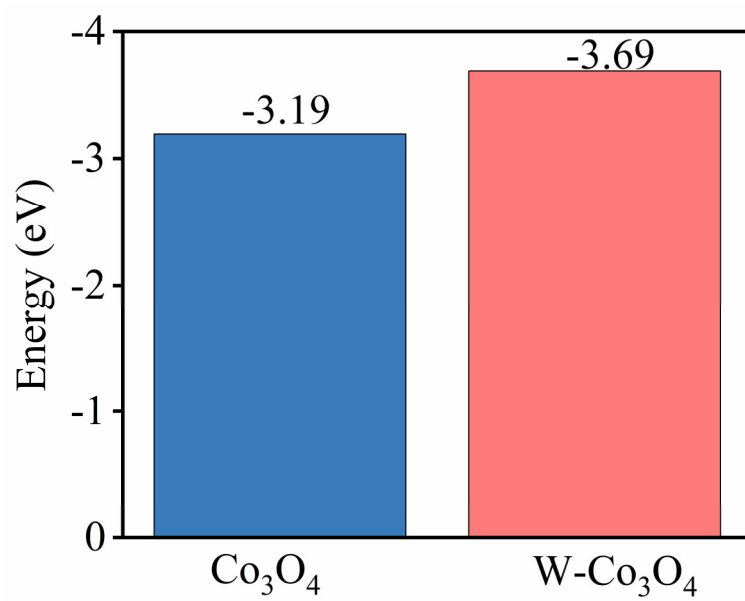

Figure S35. The O 2p band center at  $\text{Co}_3\text{O}_4$  and  $\text{W-Co}_3\text{O}_4$

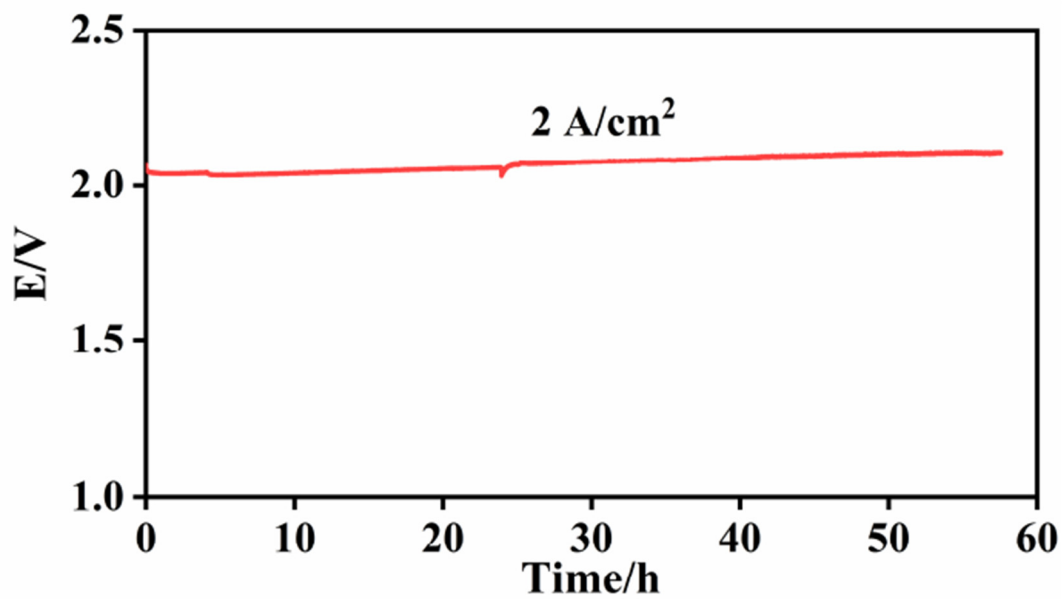

Figure S36. The Chronopotentiometry curve of the PEMWE using W-Co<sub>3</sub>O<sub>4</sub> as an OER catalyst and commercial Pt/C as an HER catalyst (Pt loading: 0.8 mg cm<sup>-2</sup>) at 2 A/cm<sup>2</sup> at 50 °C with Nafion 115 membrane.

Table S1. EXAFS fitting parameters at the Co K-edge for various samples

|                                  | shell | CN      | R(Å)      | $\sigma^2$ | $\Delta E_0$ | R factor |
|----------------------------------|-------|---------|-----------|------------|--------------|----------|
| Co foil                          | Co-Co | 12      | 2.49±0.01 | 0.0076     | 6.6±1.0      | 0.0092   |
| Co <sub>3</sub> O <sub>4</sub>   | Co-O  | 5.3     | 1.85±0.01 | 0.0028     | -8.5±0.5     | 0.0065   |
|                                  | Co-Co | 4.0     | 2.80±0.01 | 0.0031     |              |          |
|                                  | Co-Co | 8.0     | 3.40±0.01 | 0.0084     |              |          |
| W-Co <sub>3</sub> O <sub>4</sub> | Co-O  | 5.0±0.4 | 1.87±0.01 | 0.0029     | 8.0±2.7      | 0.0110   |
|                                  | Co-Co | 3.7±0.4 | 2.89±0.02 | 0.0029     |              |          |
|                                  | Co-Co | 5.1±0.9 | 3.37±0.03 | 0.0059     |              |          |

CN: coordination numbers; R: bond distance;  $\sigma^2$ : Debye-Waller factors;  $\Delta E_0$ : the inner potential correction. R factor: goodness of fit

Table S2. EXAFS fitting parameters at the W L<sub>3</sub>-edge for various samples

|                                  | shell | CN        | R(Å)       | $\sigma^2$ | $\Delta E_0$ | R factor |
|----------------------------------|-------|-----------|------------|------------|--------------|----------|
| W foil                           | W-W   | 8         | 2.74±0.004 | 0.0027     | 6.42±1.43    | 0.0078   |
|                                  | W-W   | 6         | 3.17±0.004 | 0.0035     |              |          |
| WO <sub>3</sub>                  | W-O   | 4.0±0.3   | 1.77±0.01  | 0.0024     | 7.1±1.1      | 0.0120   |
|                                  | W-O   | 1.9±0.5   | 2.17±0.02  | 0.0029     |              |          |
| W-Co <sub>3</sub> O <sub>4</sub> | W-O   | 2.80±0.47 | 1.78±0.016 | 0.0029     | 5.32±2.7     | 0.02     |

Table S3. Comparisons of the OER activity and stability of reported Co-based catalysts in acid.

| Catalysts                                             | Electrolyte                              | Activity<br>(overpotential/mV)<br>@10 mA/cm <sup>2</sup> | Stability<br>(hrs) | Reference                                        |
|-------------------------------------------------------|------------------------------------------|----------------------------------------------------------|--------------------|--------------------------------------------------|
| CeO <sub>2</sub> /Co <sub>3</sub> O <sub>4</sub>      | 0.5 M H <sub>2</sub> SO <sub>4</sub>     | 410                                                      | 50                 | <i>Nat. Commun.</i> <sup>10</sup>                |
| CoFePbO <sub>x</sub>                                  | H <sub>2</sub> SO <sub>4</sub> pH=1      | 450                                                      | 24                 | <i>Nat. Catal.</i> <sup>11</sup>                 |
| Co <sub>3</sub> O <sub>4</sub> @C/GPO                 | 1.0 M H <sub>2</sub> SO <sub>4</sub>     | 360                                                      | 42.5               | <i>Nat. Commun.</i> <sup>12</sup>                |
| Co <sub>3-x</sub> Ba <sub>x</sub> O <sub>4</sub>      | 0.5 M H <sub>2</sub> SO <sub>4</sub>     | 278                                                      | 110                | <i>JACS</i> <sup>13</sup>                        |
| Co <sub>3</sub> O <sub>4</sub>                        | 0.5 M H <sub>2</sub> SO <sub>4</sub>     | 570                                                      | 12                 | <i>Chem. Mater.</i> <sup>14</sup>                |
| Ir <sub>0.06</sub> Co <sub>2.94</sub> O <sub>4</sub>  | 0.1 M HClO <sub>4</sub>                  | 300                                                      | 200                | <i>JACS</i> <sup>15</sup>                        |
| Ag-Co <sub>3</sub> O <sub>4</sub>                     | 0.5 M H <sub>2</sub> SO <sub>4</sub>     | 470                                                      | 10                 | <i>JMCA</i> <sup>16</sup>                        |
| Ir-Co <sub>3</sub> O <sub>4</sub>                     | 0.5 M H <sub>2</sub> SO <sub>4</sub>     | 236                                                      | 30                 | <i>Nat. Commun.</i> <sup>17</sup>                |
| RuO <sub>2</sub> /(Co,Mn) <sub>3</sub> O <sub>4</sub> | 0.5 M H <sub>2</sub> SO <sub>4</sub>     | 270                                                      | 24                 | <i>Appl. Catal. B</i> <sup>18</sup>              |
| Co <sub>3</sub> O <sub>4</sub> @C                     | 0.5 M H <sub>2</sub> SO <sub>4</sub>     | 370                                                      | 86.8               | <i>Nano energy</i> <sup>19</sup>                 |
| Ru/RuO <sub>2</sub> -Co <sub>3</sub> O <sub>4</sub>   | 0.1 M HClO <sub>4</sub>                  | 226                                                      | 19                 | <i>ACS Energy Lett</i> <sup>20</sup>             |
| IrCo NDs                                              | 0.1 M HClO <sub>4</sub>                  | 390                                                      | 5.5                | <i>ACS Appl. Mater. Interfaces</i> <sup>21</sup> |
| Ir-NiCo <sub>2</sub> O <sub>4</sub> NSs               | 0.5 M H <sub>2</sub> SO <sub>4</sub>     | 240                                                      | 70                 | <i>JACS</i> <sup>22</sup>                        |
| Ta <sub>x</sub> Co <sub>3-x</sub> O <sub>4</sub>      | 0.5 M H <sub>2</sub> SO <sub>4</sub>     | 378                                                      | 140                | <i>Energy environ., Sci</i> <sup>26</sup>        |
| <b>W-Co<sub>3</sub>O<sub>4</sub></b>                  | <b>0.5 M H<sub>2</sub>SO<sub>4</sub></b> | <b>251</b>                                               | <b>250</b>         | <b><i>This work</i></b>                          |

Table S4. Adsorption free energy for OH\*, O\*, and OOH\* on different surfaces

|                                           | G <sub>ad</sub> OH* | G <sub>ad</sub> O* | G <sub>ad</sub> OOH* |
|-------------------------------------------|---------------------|--------------------|----------------------|
| Co <sub>3</sub> O <sub>4</sub> (311)-Co   | 0.70                | 2.66               | 4.27                 |
| W-Co <sub>3</sub> O <sub>4</sub> (311)-Co | 1.24                | 2.97               | 4.41                 |
| W-Co <sub>3</sub> O <sub>4</sub> (311)-W  | 0.97                | 2.48               | 3.90                 |

Table S5. OER stability of reported noble metal-free catalysts in PEMWE

| Catalysts                                                      | Current mA/cm <sup>2</sup> | Stability (hrs) | Reference                                    |
|----------------------------------------------------------------|----------------------------|-----------------|----------------------------------------------|
| La,Mn-Co <sub>3</sub> O <sub>4</sub> (LMCF)                    | 210                        | 100             | <i>Science</i> <sup>23</sup>                 |
| Co <sub>9</sub> S <sub>8</sub> /Co <sub>3</sub> O <sub>4</sub> | 50                         | 24              | <i>Angew. Chem. Int. Edit.</i> <sup>24</sup> |
| MnO <sub>2</sub>                                               | 100                        | 12              | <i>Angew. Chem. Int. Edit</i> <sup>1</sup>   |
| CoFeNiMoWTe                                                    | 1000                       | 100             | <i>Adv. Energy. Matter</i> <sup>25</sup>     |
|                                                                | <b>100</b>                 | <b>400</b>      |                                              |
| <b>W-Co<sub>3</sub>O<sub>4</sub></b>                           | <b>250</b>                 | <b>310</b>      | <b><i>This work</i></b>                      |
|                                                                | <b>1000</b>                | <b>240</b>      |                                              |

## Reference

1. A. Li, H. Ooka, N. Bonnet, T. Hayashi, Y. Sun, Q. Jiang, C. Li, H. Han and R. Nakamura, *Angew. Chem., Int. Edit.*, 2019, **58**, 5054-5058.
2. Y. Zhu, J. Wang, T. Koketsu, M. Kroschel, J.-M. Chen, S.-Y. Hsu, G. Henkelman, Z. Hu, P. Strasser and J. Ma, *Nat. Commun.*, 2022, **13**, 7754-7754.
3. A. B. Anderson, J. Roques, S. Mukerjee, V. S. Murthi, N. M. Markovic and V. Stamenkovic, *J. Phys. Chem. B.*, 2005, **109**, 1198-1203.
4. Y. Duan, N. Dubouis, J. Huang, D. A. Dalla Corte, V. Pimenta, Z. J. Xu and A. Grimaud, *ACS Catal.*, 2020, **10**, 4160-4170.
5. J. Huang, H. Sheng, R. D. Ross, J. Han, X. Wang, B. Song and S. Jin, *Nat. Commun.*, 2021, **12**, 3036.
6. G. Kresse and J. Furthmuller, *Computational Materials Science*, 1996, **6**, 15-50.
7. G. Kresse and J. Furthmuller, *Phys. Rev. B.*, 1996, **54**, 11169-11186.
8. J. P. Perdew, K. Burke and M. Ernzerhof, *Phys. Rev. Lett.*, 1997, **78**, 1396-1396.
9. I. C. Man, H.-Y. Su, F. Calle-Vallejo, H. A. Hansen, J. I. Martinez, N. G. Inoglu, J. Kitchin, T. F. Jaramillo, J. K. Norskov and J. Rossmeisl, *Chemcatchem*, 2011, **3**, 1159-1165.
10. J. Z. Huang, H. Y. Sheng, R. D. Ross, J. C. Han, X. J. Wang, B. Song and S. Jin, *Nat. Commun.*, 2021, **12**, 3036.
11. M. Chatti, J. L. Gardiner, M. Fournier, B. Johannessen, T. Williams, T. R. Gengenbach, N. Pai, N. Cuong, D. R. MacFarlane, R. K. Hocking and A. N. Simonov, *Nat. Catal.*, 2019, **2**, 457-465.
12. J. Yu, F. A. Garces Pineda, J. Gonzalez Cobos, M. Pena-Diaz, C. Rogero, S. Gimenez, M. Chiara Spadaro, J. Arbiol, S. Barja and J. Ramon Galan Mascaros, *Nat. Commun.*, 2022, **13**, 4341.
13. N. Wang, P. Ou, R. K. Miao, Y. Chang, Z. Wang, S.-F. Hung, J. Abed, A. Ozden, H.-Y. Chen, H.-L. Wu, J. E. Huang, D. Zhou, W. Ni, L. Fan, Y. Yan, T. Peng, D. Sinton, Y. Liu, H. Liang and E. H. Sargent, *J. Am. Chem. Soc.*, 2023, **145**, 7829-7836.
14. J. S. Mondschein, J. F. Callejas, C. G. Read, J. Y. C. Chen, C. F. Holder, C. K. Badding and R. E. Schaak, *Chem. Mater.*, 2017, **29**, 950-957.
15. J. Shan, C. Ye, S. Chen, T. Sun, Y. Jiao, L. Liu, C. Zhu, L. Song, Y. Han, M. Jaroniec, Y. Zhu, Y. Zheng and S.Z. Qiao, *J. Am. Chem. Soc.*, 2021, **143**, 5201-5211.

16. K.-L. Yan, J.-Q. Chi, J.-Y. Xie, B. Dong, Z.-Z. Liu, W.-K. Gao, J.-H. Lin, Y.-M. Chai and C.-G. Liu, *Renewable Energy*, 2018, **119**, 54-61.
17. Y. Zhu, J. Wang, T. Koketsu, M. Kroschel, J. M. Chen, S. Y. Hsu, G. Henkelman, Z. Hu, P. Strasser and J. Ma, *Nat. Commun.*, 2022, **13**, 7754.
18. S. Niu, X.-P. Kong, S. Li, Y. Zhang, J. Wu, W. Zhao and P. Xu, *Appl. Catal. B: Environ.*, 2021, **297**, 120442.
19. X. Yang, H. Li, A.-Y. Lu, S. Min, Z. Idriss, M. N. Hedhili, K.-W. Huang, H. Idriss and L. J. Li, *Nano Energy*, 2016, **25**, 42-50.
20. T. Wang, Z. Li, H. Jang, M. G. Kim, Q. Qin and X. Liu, *ACS Sustain. Chem & Eng.*, 2023, **11**, 5155-5163.
21. L. Fu, X. Zeng, G. Cheng and W. Luo, *ACS Appl. Mater. Interfaces*, 2018, **10**, 24993-24998.
22. J. Yin, J. Jin, M. Lu, B. Huang, H. Zhang, Y. Peng, P. Xi and C.H. Yan, *J. Am. Chem. Soc.*, 2020, **142**, 18378-18386.
23. L. Chong, G. Gao, J. Wen, H. Li, H. Xu, Z. Green, J. D. Sugar, A. J. Kropf, W. Xu, X. M. Lin, H. Xu, L. W. Wang and D. J. Liu, *Science*, 2023, **380**, 609-616.
24. L. Wang, H. Su, Z. Zhang, J. Xin, H. Liu, X. Wang, C. Yang, X. Liang, S. Wang, H. Liu, Y. Yin, T. Zhang, Y. Tian, Y. Li, Q. Liu, X. Sun, J. Sun, D. Wang and Y. Li, *Angew. Chem., Int. Edit.*, 2023, e202314185.
25. S. Jo, M.C. Kim, K. B. Lee, H. Choi, L. Zhang and J. I. Sohn, *Adv. Energy Mater.*, 2023, **13**, 2301420.
26. K. Lee, J. Shim, H. Ji, J. Kim, H. S. Lee, H. Shin, M. S. Bootharaju, K. S. Lee, W. Ko, J. Lee, K. Kim, S. Yoo, S. Heo, J. Ryu, S. Back, B. H. Lee, Y. E. Sung and T. Hyeon, *Energy Environ. Sci.*, 2024, **17**, 3618-3628.
